# Supplementary material for: Extracellular Matrix Protein-1 as a Mediator of Inflammation-Induced Fibrosis After Myocardial Infarction
Source: PubMed Central journal article supplement — JACC Basic Transl Sci. 2023 Aug 16;8(12):1539–54. doi: 10.1016/j.jacbts.2023.05.010 (PMC10774582; doi:10.1016/j.jacbts.2023.05.010), 2023-08-16
Supplement: mmc1.pdf [file mmc1.pdf]

**Supplemental Figure 1. Analysis of ECM1 expression in sc/snRNA-seq of cardiac interstitial cells from healthy human hearts.<sup>1</sup>** UMAP and violin plots of ECM1 expression levels in specific cardiac cell-sub populations: fibroblasts (A), leukocytes (B), and vascular cells (C). ECM1 positive cells are displayed as a blue overlay on grey total cell identity UMAP coordinates.

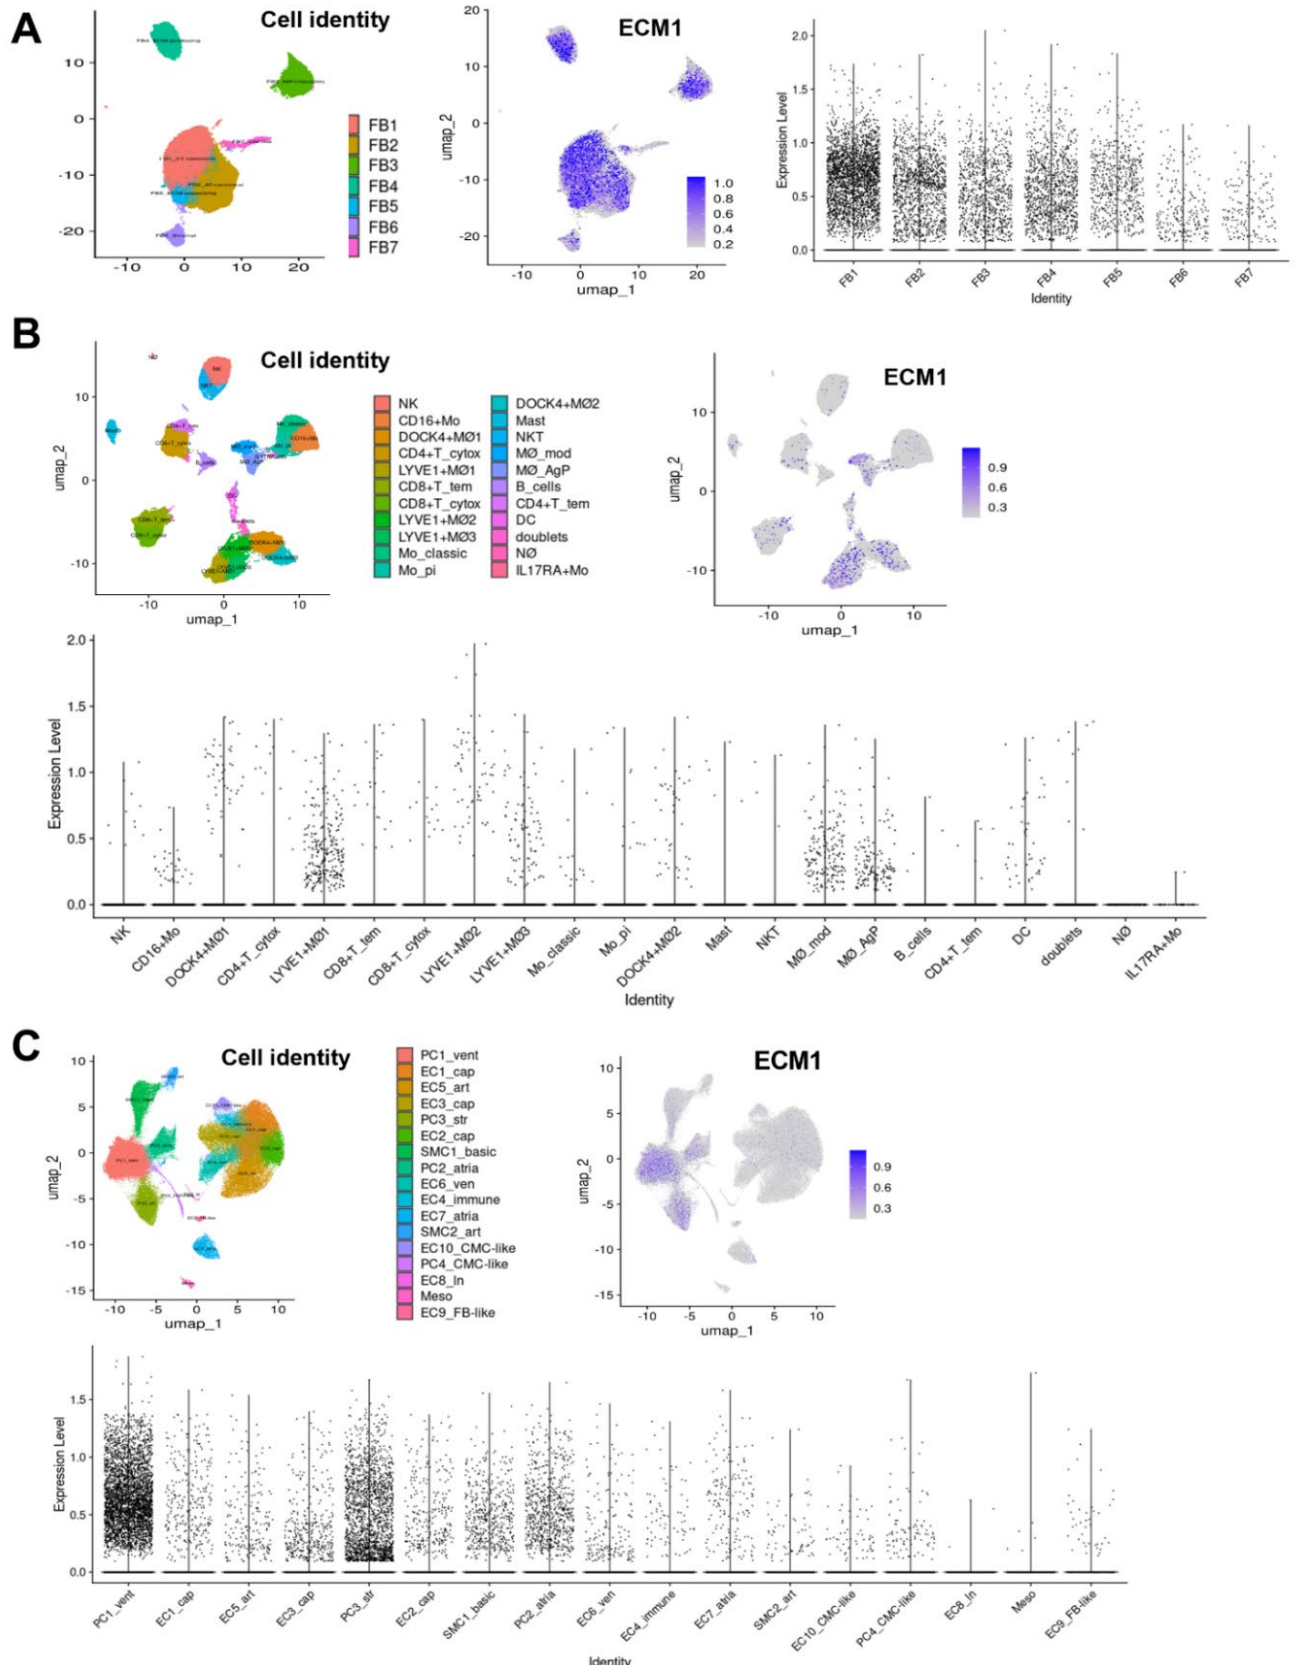

**Supplemental Figure 2. Analysis of ECM1 expression in human dilated cardiomyopathy and sc/snRNA-seq of cardiac interstitial cells from mouse hearts post-TAC.<sup>2</sup> A)**

Immunohistochemistry of ECM1 protein expression in the human heart with dilated cardiomyopathy (DCM) shows ECM1 expression is predominantly interstitial, localized to fibrotic and peri-vascular areas (40x magnification). B-C) UMAP and violin plots of ECM1 expression levels in specific cardiac cell-sub populations in sham and post-TAC, including fibroblasts (cluster 0) and macrophages (cluster 1) and endothelial cells (clusters 2-5 & 13). D) ECM1 positive cells are displayed as a red overlay on grey total cell identity UMAP coordinates. E) violin plots of ECM1 expression levels in specific cardiac cell-sub populations in sham and post-TAC. F) A column graph showing ECM1+ cell numbers increase in fibroblast (CFb) and macrophage (MΦ) clusters post-TAC, relative to sham.

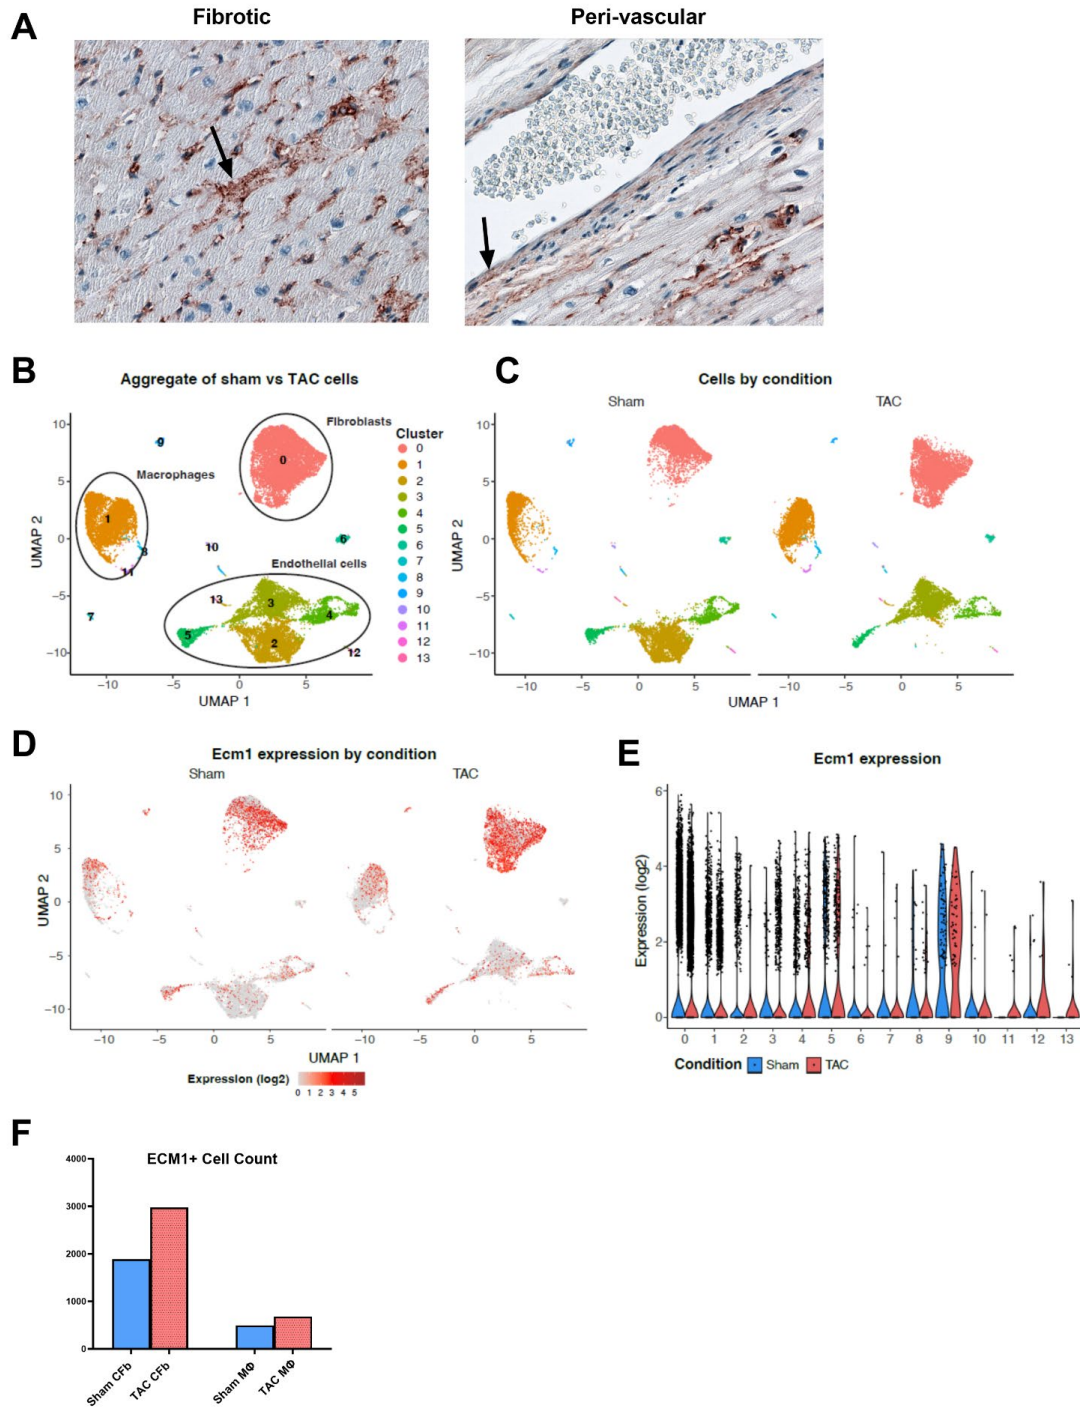

**Supplemental Figure 3. ECM1 activates Rac1,2,3 activity, and co-localizes with and phosphorylates CTNND1.** A) G-LISA assay showed ECM1 treatment (20ng/ml) for 10min significantly increased Rac1,2,3 activity ( $p=0.037$ ); presented as mean  $\pm$  SD, assessed via Student's T-test  $n=6$ /group. B) Immunofluorescence of HuCFb cells in culture showed ECM1 co-localizes with CTNND1 (40x magnification zoomed in), arrowhead shows an example area of interest. C) Western blotting showed ECM1 treatment (20ng/ml) for 10min significantly increased CTNND1 phosphorylation at serine 268 (left) and 252 (right) (assessed as the ratio of phosphorylated/total CTNND1); presented as mean  $\pm$  SD, assessed via Student's T-test  $n=6$ /group. F) \* $p<0.05$ ; \*\*\* $p<0.001$ ; \*\*\*\* $p<0.0001$ .

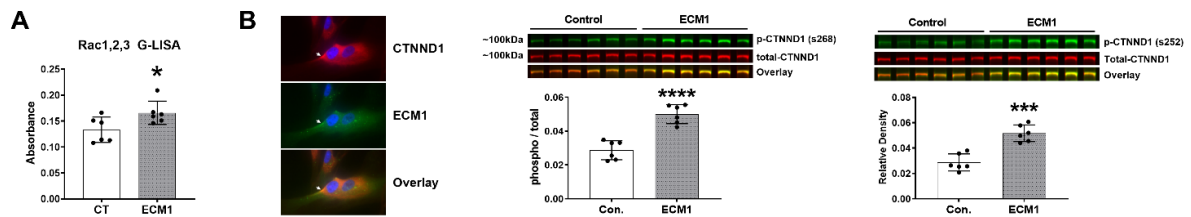

**Supplemental Table 1:** Percentage of major cell types which contribute to total interstitial cell number in human heart (excluding myocytes).<sup>1</sup>

| <b>Cell type</b>          | <b>Percentage of total cells in dataset</b> |
|---------------------------|---------------------------------------------|
| Adi (adipocytes)          | 0.78                                        |
| EC (endothelial cells)    | 20.69                                       |
| FB (fibroblasts)          | 12.21                                       |
| Total Leukocytes          | 8.41                                        |
| Meso (mesothelial cells)  | 0.15                                        |
| NC (neuronal cells)       | 0.81                                        |
| PC (pericytes)            | 16.02                                       |
| SMC (smooth muscle cells) | 3.34                                        |

**Supplemental Table 2:** Characteristics of the most prominent ECM1 expressing human cardiac cell populations. Cell characteristics are as previously described.<sup>1</sup>

| <b>Fibroblast populations</b>                                       |                                                                                                                                                                                                                                                                                                                                                                                                                      |
|---------------------------------------------------------------------|----------------------------------------------------------------------------------------------------------------------------------------------------------------------------------------------------------------------------------------------------------------------------------------------------------------------------------------------------------------------------------------------------------------------|
| <b>FB1</b> (VT-canonical)                                           | regional enrichment in ventricles (left, right, apex and interventricular septum). Express canonical genes and define a basal, chamber-specific FB expression program FB1, FB4–FB6 are enriched in the ventricles                                                                                                                                                                                                    |
| <b>FB2</b> (AT-canonical)                                           | regional enrichment in atria (left and right). FB2 cells express canonical genes and define a basal, chamber-specific FB expression program.                                                                                                                                                                                                                                                                         |
| <b>FB3</b> (macrophage/MP-interacting)                              | regional enrichment in atria (left and right). FB3 are less abundant in the left ventricle, have lower expression of ECM-related genes but higher expression of cytokine receptors such as OSMR and ILST643. These distinctive fibroblast gene programs probably govern stress-responsive cardiac remodeling and contribute to homeostasis. Also enriched for oncostatin M pathway compared to other FB populations. |
| <b>FB4</b> (ECM-producing)                                          | Enriched in the ventricles (left, right, apex and interventricular septum). Less abundant in the right atrium than other regions. Express genes responsive to TGF $\beta$ signaling (for example, POSTN and TNC)                                                                                                                                                                                                     |
| <b>FB5</b> (ECM-organizing)                                         | Enriched in the ventricles (left, right, apex and interventricular septum). Less abundant in the right atrium than other regions. Have higher expression of genes involved in the production, remodeling and degradation of extracellular matrix (ECM).                                                                                                                                                              |
| <b>Leukocyte populations</b>                                        |                                                                                                                                                                                                                                                                                                                                                                                                                      |
| <b>LYVE1+M<math>\emptyset</math>1</b>                               | Cardiac monocyte-derived macrophages. Enriched in clathrin and cathepsin genes. Related to recently described tissue-resident macrophages associated with cardiovascular remodeling, although they are negative for TIMD4.                                                                                                                                                                                           |
| <b>M<math>\emptyset</math>_mod</b> (monocyte derived macrophages )  | Monocyte-derived macrophages. Express LYVE1 and FOLR2, monocyte-like markers CEBPB and S100A8, and chemoattractant cytokine genes CCL13 and CCL18.                                                                                                                                                                                                                                                                   |
| <b>M<math>\emptyset</math>_AgP</b> (antigen presenting macrophages) | Antigen-presenting macrophages are FOLR2–, LYVE1– and MERTK–, and enrich for HLA-DRA, HLA-DMA, HLA-DMB, HLA-DPA1 and TREM2 (described in lipid-associated macrophages).                                                                                                                                                                                                                                              |
| <b>LYVE1+M<math>\emptyset</math>2</b>                               | Similar to LYVE1+M $\emptyset$ 1, except not necessarily cardiac monocyte-derived. Enriched in clathrin and cathepsin genes. Related to recently described tissue-resident macrophages associated with cardiovascular remodeling, although they are negative for TIMD4.                                                                                                                                              |
| <b>LYVE1+M<math>\emptyset</math>3</b>                               | Similar to LYVE1+M $\emptyset$ 1 and LYVE1+M $\emptyset$ 2, except LYVE1+M $\emptyset$ 3 are enriched for HLA-DOA, HLA-DQA1/2 and HLA-DQB1. Also related to recently described tissue-resident macrophages associated with cardiovascular remodeling, although negative for TIMD4.                                                                                                                                   |
| <b>Vascular populations</b>                                         |                                                                                                                                                                                                                                                                                                                                                                                                                      |
| <b>PC1_vent</b> (ventricle-enriched pericytes)                      | Enriched in ventricles. Enriched for adhesion molecules (NCAM2 and CD38), and CSPG4, which is involved in microvascular morphogenesis and EC cross-talk                                                                                                                                                                                                                                                              |
| <b>PC3_str</b> (stromal pericytes)                                  | Co-express pericyte markers and very low levels of pan-EC transcripts. RNA velocity analyses suggest a directionality that indicates PC3_str cells as a transitional state between pericytes and ECs (Extended Data Fig. 4h, i). These observations may relate to bidirectional pericyte or endothelial cell (trans)differentiation, which remains controversial                                                     |
| <b>PC2_atria</b> (atria-enriched pericytes)                         | Enriched in the atria and express a similar profile of adhesion molecules as PC1_vent.                                                                                                                                                                                                                                                                                                                               |

|                   |                                                                                                                                                                                                                                                                         |
|-------------------|-------------------------------------------------------------------------------------------------------------------------------------------------------------------------------------------------------------------------------------------------------------------------|
| <b>SMC1_basic</b> | Vascular SMCs that express MYH11, express transcripts that indicate immaturity, including the stem-cell marker LGR6 (Barker and Clevers, 2010), and proliferation-associated RGS5 (Daniel et al., 2016). SMC1_basic may be venous-derived (Vanlandewijck et al., 2018). |
|-------------------|-------------------------------------------------------------------------------------------------------------------------------------------------------------------------------------------------------------------------------------------------------------------------|

**Supplemental Table 3: Most prominent ECM1 expressing cell population metadata (not including expression level).<sup>1</sup>**

|                | Cell type                      | ECM1 negative | ECM1 positive | total # cells | % ECM1+ | cell type as a % of all cells | ECM1+ cells as % of all cells |
|----------------|--------------------------------|---------------|---------------|---------------|---------|-------------------------------|-------------------------------|
| Fibroblasts    | FB1_VT-canonical               | 24075         | 2557          | 26632         | 9.6012  | 5.48                          | 0.53                          |
|                | FB2_AT-canonical               | 12517         | 1262          | 13779         | 9.1589  | 2.83                          | 0.26                          |
|                | FB4_ECM-producing              | 5079          | 1067          | 6146          | 17.3609 | 1.26                          | 0.22                          |
|                | FB3_MP-interacting             | 6854          | 890           | 7744          | 11.4928 | 1.59                          | 0.18                          |
|                | FB5_ECM-organising             | 1935          | 583           | 2518          | 23.1533 | 0.52                          | 0.12                          |
|                | FB6_Stromal                    | 1383          | 227           | 1610          | 14.0994 | 0.33                          | 0.05                          |
|                | FB7_CM-like                    | 756           | 156           | 912           | 17.1053 | 0.19                          | 0.03                          |
|                | <b>Combined Fibroblasts</b>    |               | 6742          | 59341         | 11.3615 | 12.21                         | 1.39                          |
|                |                                |               |               |               |         |                               |                               |
|                | Cell type                      | ECM1 negative | ECM1 positive | total # cells | % ECM1+ | cell type as a % of all cells | ECM1+ cells as % of all cells |
| Vascular Cells | PC1_vent                       | 46535         | 3560          | 50095         | 7.1065  | 10.30                         | 0.73                          |
|                | PC3_str                        | 12385         | 1846          | 14231         | 12.9717 | 2.93                          | 0.38                          |
|                | PC2_atria                      | 10609         | 714           | 11323         | 6.3057  | 2.33                          | 0.15                          |
|                | SMC1_basic                     | 12623         | 491           | 13114         | 3.7441  | 2.70                          | 0.10                          |
|                | EC3_cap                        | 16528         | 369           | 16897         | 2.1838  | 3.48                          | 0.08                          |
|                | EC1_cap                        | 27134         | 283           | 27417         | 1.0322  | 5.64                          | 0.06                          |
|                | EC2_cap                        | 13171         | 274           | 13445         | 2.0379  | 2.77                          | 0.06                          |
|                | EC5_art                        | 20122         | 195           | 20317         | 0.9598  | 4.18                          | 0.04                          |
|                | EC6_ven                        | 8316          | 170           | 8486          | 2.0033  | 1.75                          | 0.03                          |
|                | EC7_atria                      | 4327          | 158           | 4485          | 3.5229  | 0.92                          | 0.03                          |
|                | PC4_CMC-like                   | 2114          | 93            | 2207          | 4.2139  | 0.45                          | 0.02                          |
|                | EC4_immune                     | 5560          | 77            | 5637          | 1.3660  | 1.16                          | 0.02                          |
|                | SMC2_art                       | 3060          | 68            | 3128          | 2.1739  | 0.64                          | 0.01                          |
|                | EC10_CMC-like                  | 2547          | 61            | 2608          | 2.3390  | 0.54                          | 0.01                          |
|                | EC9_FB-like                    | 491           | 42            | 533           | 7.8799  | 0.11                          | 0.01                          |
|                | Meso                           | 712           | 6             | 718           | 0.8357  | 0.15                          | 0.00                          |
|                | EC8_In                         | 751           | 3             | 754           | 0.3979  | 0.16                          | 0.00                          |
|                | <b>Combined Vascular Cells</b> |               | 8410          | 195395        | 4.3041  | 40.19                         | 1.73                          |
|                |                                |               |               |               |         |                               |                               |
|                | Cell type                      | ECM1 negative | ECM1 positive | total # cells | % ECM1+ | cell type as a % of all cells | ECM1+ cells as % of all cells |
| Leukocytes     | LYVE1+MØ                       | 2762          | 256           | 3018          | 8.4824  | 0.62                          | 0.05                          |
|                | MØ_mod                         | 1141          | 172           | 1313          | 13.0998 | 0.27                          | 0.04                          |
|                | MØ_AgP                         | 1135          | 143           | 1278          | 11.1893 | 0.26                          | 0.03                          |
|                | LYVE1+MØ3                      | 1871          | 86            | 1957          | 4.3945  | 0.40                          | 0.02                          |
|                | LYVE1+MØ2                      | 2029          | 59            | 2088          | 2.8257  | 0.43                          | 0.01                          |
|                | DOCK4+MØ1                      | 3188          | 51            | 3239          | 1.5746  | 0.67                          | 0.01                          |



|                            |      |      |       |         |      |      |
|----------------------------|------|------|-------|---------|------|------|
| DC                         | 769  | 45   | 814   | 5.52823 | 0.17 | 0.01 |
| DOCK4+MØ2                  | 1586 | 40   | 1626  | 2.4600  | 0.33 | 0.01 |
| CD16+Mo                    | 3247 | 31   | 3278  | 0.9457  | 0.67 | 0.01 |
| CD8+T_tem                  | 2977 | 24   | 3001  | 0.7997  | 0.62 | 0.00 |
| Mo_classic                 | 1867 | 16   | 1883  | 0.8497  | 0.39 | 0.00 |
| CD8+T_cytox                | 2941 | 15   | 2956  | 0.5074  | 0.61 | 0.00 |
| CD4+T_cytox                | 3099 | 14   | 3113  | 0.4497  | 0.64 | 0.00 |
| Mo_pi                      | 1640 | 12   | 1652  | 0.7264  | 0.34 | 0.00 |
| NK                         | 3617 | 11   | 3628  | 0.3032  | 0.75 | 0.00 |
| doublets                   | 614  | 9    | 623   | 1.4446  | 0.13 | 0.00 |
| CD4+T_tem                  | 1041 | 6    | 1047  | 0.5731  | 0.22 | 0.00 |
| Mast                       | 1538 | 5    | 1543  | 0.3240  | 0.32 | 0.00 |
| NKT                        | 1459 | 4    | 1463  | 0.2734  | 0.30 | 0.00 |
| B_cells                    | 1191 | 4    | 1195  | 0.3347  | 0.25 | 0.00 |
| IL17RA+Mo                  | 31   | 1    | 32    | 3.125   | 0.01 | 0.00 |
| NØ                         | 121  | 0    | 121   | 0       | 0.02 | 0.00 |
| <b>Combined Leukocytes</b> |      | 1004 | 40868 | 2.4567  | 8.41 | 0.21 |

**Supplemental Table 4:** Most prominent ECM1 expressing cell population, specific expression levels.<sup>1</sup>; \* = all expression values were multiplied by a factor of 10 to produce larger/more visually interpretable numbers.

| Cell type          | average ECM1 expression* |
|--------------------|--------------------------|
| FB5_ECM-organising | 2.156545642              |
| FB4_ECM-producing  | 1.495260315              |
| FB1_VT-canonical   | 0.985049919              |
| PC3_str            | 0.9548165                |
| FB3_MP-interacting | 0.94968919               |
| FB7_CM-like        | 0.869133827              |
| FB2_AT-canonical   | 0.809450903              |
| FB6_Stromal        | 0.717818108              |
| PC1_vent           | 0.708297307              |
| MØ_mod             | 0.696993674              |
| LYVE1+MØ2          | 0.540295116              |
| EC9_FB-like        | 0.513880249              |
| PC2_atria          | 0.511881155              |
| LYVE1+MØ1          | 0.484529609              |
| MØ_AgP             | 0.462991062              |
| DC                 | 0.400493194              |
| LYVE1+MØ3          | 0.380614456              |
| EC7_atria          | 0.328767895              |
| SMC1_basic         | 0.259398339              |
| DOCK4+MØ1          | 0.258763987              |
| DOCK4+MØ2          | 0.245173465              |
| PC4_CMC-like       | 0.241680387              |
| EC2_cap            | 0.155614417              |
| CD8+T_tem          | 0.120402501              |
| EC3_cap            | 0.120011558              |
| EC6_ven            | 0.118434211              |
| SMC2_art           | 0.103660082              |
| EC1_cap            | 0.101689835              |
| EC4_immune         | 0.099793675              |
| EC10_CMC-like      | 0.097193263              |
| Meso               | 0.089125168              |
| Mo_pi              | 0.088484013              |
| IL17RA+Mo          | 0.086873008              |
| CD4+T_cytox        | 0.086744052              |
| EC5_art            | 0.063658103              |
| CD8+T_cytox        | 0.05822222               |
| Mast               | 0.055934149              |
| Mo_classic         | 0.050510158              |
| NKT                | 0.042248601              |
| CD4+T_tem          | 0.034450231              |

|         |             |
|---------|-------------|
| CD16+Mo | 0.032345739 |
| NK      | 0.031131977 |
| EC8_In  | 0.024524133 |
| B_cells | 0.023164137 |
| NØ      | 0           |

**Supplemental Table 5:** Characteristics of most prominent ECM1 expressing mouse cardiac cell sub-populations. Cell characteristics are as described<sup>3</sup> with the exception of MAC8 cells, which we defined here for the first time.

| <b>Fibroblast populations</b>        |                                                                                                                                                                                                                                                                                                                                                                                                                                                                                                                                                                                                                                                                                                                                                                                                                                                                                                                                                                                                                                                                                                                                                                                                                |
|--------------------------------------|----------------------------------------------------------------------------------------------------------------------------------------------------------------------------------------------------------------------------------------------------------------------------------------------------------------------------------------------------------------------------------------------------------------------------------------------------------------------------------------------------------------------------------------------------------------------------------------------------------------------------------------------------------------------------------------------------------------------------------------------------------------------------------------------------------------------------------------------------------------------------------------------------------------------------------------------------------------------------------------------------------------------------------------------------------------------------------------------------------------------------------------------------------------------------------------------------------------|
| <b>Fibroblast-Sca1-high (F-SH)</b>   | Resident, unactivated fibroblast population, most prominent in sham hearts. Expresses canonical fibroblast markers such as <i>Pdgfra</i> , <i>Pdgfra-GFP</i> , <i>Ddr2</i> and <i>Col1a1</i> . Contains the highest frequency of <i>Pdgfra</i> and <i>Ly6a(Sca1)</i> -expressing cells, and enriched in S+P+ ( <i>SCA1</i> + <i>PDGFR</i> $\alpha$ +) fibroblasts and clonal colony-forming units. Enriched in cardiac colony-forming mesenchymal stromal cell (MSC)-like cells (cCFU-F), which show multi-lineage differentiation and self-renewal in vitro. Characterized by over-representation of genes involved in the biological process (BP) cell adhesion, which included cell surface receptor genes <i>Ackr3(Cxcr-7)</i> , <i>Thy1(Cd90)</i> , <i>Axl</i> and <i>Cd34</i> .                                                                                                                                                                                                                                                                                                                                                                                                                          |
| <b>Fibroblast-Sca1-low (F-SL)</b>    | Resident, unactivated fibroblast population, most prominent in sham hearts. Expresses canonical fibroblast markers such as <i>Pdgfra</i> , <i>Pdgfra-GFP</i> , <i>Ddr2</i> and <i>Col1a1</i> . Characterized by GO BP terms signaling and signal transduction. Within the signal transduction category, majority secreted proteins including <i>APOE</i> , <i>BMP4</i> and <i>ADM</i> . Thus, F-SL, a major sub-division of fibroblasts, has a unique secretory phenotype distinct from that in F-SH, which is enriched in MSC-like colony forming cells.                                                                                                                                                                                                                                                                                                                                                                                                                                                                                                                                                                                                                                                      |
| <b>Activated fibroblasts (F-Act)</b> | Activated fibroblast population. Express <i>Postn</i> at high levels in ~80% of cells. Express <i>Acta2</i> in 28% (MI-day 3) and 35% (MI-day 7), much lower levels compared to MYO; suggests a contractile phenotype in some F-Act cells. Most closely related to F-SH & F-SL and is more distant from MYO. F-Act over-represent GOBP terms collagen fibril organization and regulation of wound healing. F-Act top upregulated gene is <i>Cilp</i> , encoding a matricellular protein and inhibitor of TGF- $\beta$ 1 signaling, consistent with F-Act being a pre-MYO population in which fibrosis is constrained. F-Act acts as an intermediary population for MYO, as it expands by proliferation up to MI-day 3 and differentiates to MYO during the transition from MI-day 3 to MI-day 7.                                                                                                                                                                                                                                                                                                                                                                                                               |
| <b>Myofibroblasts (Myo)</b>          | Activated fibroblasts. Represent 11.49% of total interstitial cells at MI-day 7; 2nd most populous cell type to M2M $\Phi$ at day 7. Express fibrogenic (e.g. <i>Periostin</i> ; <i>POSTN</i> ) and/or contractile (e.g. $\alpha$ Smooth Muscle Actin; $\alpha$ SMA) proteins. Show strong upregulation of numerous collagen genes (e.g. <i>Col1a1</i> , <i>Col3a1</i> , <i>Col5a2</i> ), <i>Postn</i> (99.5%) and <i>Acta2</i> (61%). Upregulated genes involved in wound healing and cell migration including <i>Fn(Fibronectin)</i> and <i>Cthrc1(Collagen Triple Helix Repeat Containing I)</i> . Have decreased expression of <i>Pdgfra</i> , <i>Pdgfra-GFP</i> , <i>Ly6a(Sca1)</i> , <i>Thy1(Cd90)</i> and <i>Cd34</i> , indicating loss of stem/progenitor cell markers. GOBP terms are collagen fibril organization and cell adhesion, containing collagen genes <i>Col3a1</i> , <i>Col5a1</i> , <i>Col11a1</i> and <i>Col14a1</i> , and others involved in cell:cell and cell:matrix adhesion including <i>Thbs1</i> (encoding <i>Thrombospondin 1</i> ) and <i>Fbn1</i> . Other terms included angiogenesis and heart development as well as negative regulation of canonical Wnt signaling pathway. |
| <b>(F-WntX)</b>                      | Characterised by an anti-WNT, anti-CTGF and anti-TGF- $\beta$ extracellular and intracellular signaling milieu. Expressed <i>Postn(Periostin)</i> , <i>Acta2(<math>\alpha</math>SMA)</i> , <i>Tagln(Transgelin)</i> and <i>Scx(Scleraxis)</i> , in both sham and MI conditions, suggesting an activated state even in the absence of injury. Top upregulated gene was <i>Wif1</i> , encoding a secreted canonical WNT pathway inhibitor essential for cardiac repair after MI (Meyer et al., 2017). <i>WIF1</i> can also antagonize Connective Tissue Growth Factor (CTGF) signaling (Surmann-Schmitt et al., 2012), which plays a supportive role in cardiac fibrosis (Travers et al., 2016). <i>Wif1</i> was almost uniquely expressed in F-WntX in all conditions. Multiple other WNT pathway-related genes were upregulated encoding WNT ligands ( <i>WNT5a</i> , <i>WNT16</i> ), soluble WNT antagonists ( <i>DKK3</i> , <i>SFRP2</i> ), membrane-bound WNT receptor ( <i>FRZB</i> ) and <i>AXIN2</i> , a component of the $\beta$ -catenin destruction complex. F-WntX also showed upregulated <i>Fmod</i> ,                                                                                             |

|                                                                      |                                                                                                                                                                                                                                                                                                                                                                                                                                                                                                                                                                                                                                                                                                                                                                                         |
|----------------------------------------------------------------------|-----------------------------------------------------------------------------------------------------------------------------------------------------------------------------------------------------------------------------------------------------------------------------------------------------------------------------------------------------------------------------------------------------------------------------------------------------------------------------------------------------------------------------------------------------------------------------------------------------------------------------------------------------------------------------------------------------------------------------------------------------------------------------------------|
|                                                                      | which inhibits fibrillogenesis and sequesters pro-fibrotic factor TGF- $\beta$ within ECM. Overall, this signature suggests an anti-WNT, anti-CTGF and anti-TGF- $\beta$ extracellular and intracellular signaling milieu for F-WntX cells.                                                                                                                                                                                                                                                                                                                                                                                                                                                                                                                                             |
| <b>Leukocyte populations</b>                                         |                                                                                                                                                                                                                                                                                                                                                                                                                                                                                                                                                                                                                                                                                                                                                                                         |
| <b>Cardiac tissue resident macrophages (MAC-TR)</b>                  | Cardiac tissue-resident M $\Phi$ . Have a cell signature of Cx3cr1high Adgre1(F4/80)high H2-Aa(MHC-II)+ Itgam(CD11b)low Ly6c2low Ccr2-. Upregulated pro-regenerative genes Igf1 and Pdgfb/c.                                                                                                                                                                                                                                                                                                                                                                                                                                                                                                                                                                                            |
| <b>M1 macrophages (M1M<math>\Phi</math>)</b>                         | Classical inflammatory monocyte-derived M1 macrophages (M1M $\Phi$ ). One of the most abundant cell types at MI day 3. Express a cell signature of Ccr2high Adgre1(F4/80)+ Ly6c2+ H2-Aa(MHC-II)+. Also express additional M $\Phi$ markers including Mertk and C1q. Hierarchical clustering shows M1M $\Phi$ are most closely related to M1 monocytes. Differentially expressed genes show over-representation in GO terms for leukocyte migration and responses to interleukin-1.                                                                                                                                                                                                                                                                                                      |
| <b>M2 macrophages (M2M<math>\Phi</math>)</b>                         | Non-classical M2 M $\Phi$ involved in inflammation resolution and repair, and the most prominent population at MI-day 7; M2M $\Phi$ population increases late during injury repair from <2% of TIP in sham and MI-day 3 hearts, to 16% at MI-day 7. Closely related to tissue-resident macrophages (MAC-TR). Express a cell signature of Ccr2high Adgre1(F4/80)+ H2-Aa(MHC-II)high Ly6c2-. Also express Cx3cr1, and have upregulated pro-regenerative genes Igf1 and Pdgfb/c. The majority of M2M $\Phi$ were Ccr2high (important for migration); however, a minor sub-population was Ccr2low and these expressed the highest levels of Igf1 and lower levels of MHC-II. Differentially expressed genes show over-representation of show GO term antigen presentation via MHC class II. |
| <b>M1 monocytes (M1Mo)</b>                                           | Classical blood-derived M1 monocytes (M1Mo). Characterized by the expression signature Adgre1(F4/80)+ Itgam(CD11b)+ Fcgr1(CD64)+ Ly6c2high Ccr2high H2-Aa(MHC-II)low. Also characterized by having lower size and granularity than M $\Phi$ , and lower levels of M $\Phi$ markers Adgre(F4/80), Itgam(CD11b) and H2-Aa(MHC-II). At MI-day 3 M1Mo are also low or negative for the M $\Phi$ markers Siglec1, Mrc1, Maf, Trem2 and Mertk (involved in phagocytosis), and C1 complement genes C1qa, b and c which are involved in recruitment of new inflammatory cells and protection against autoimmunity (in addition to complement fixation). Differentially expressed genes show over-representation of GO terms for cell migration, inflammation and T cell activation.             |
| <b>(MAC8)</b>                                                        | Differentially expressed genes show over-representation in GO terms for inflammatory response and regulation of response to external stimulus. When MAC8 marker genes greater than 1.25-fold upregulated against all other cells were subject to GOnet enrichment, there is an over-representation of GOBP response to stimulus, inflammatory response and myeloid leukocyte/neutrophil/granulocyte/neutrophil cell migration or chemotaxis/locomotion; the top GOMF term was signaling receptor binding. Suggesting a responsive, cell phenotype most notably associated with paracrine signaling and migratory/chemotactic or locomotive effects.                                                                                                                                     |
| <b>interferon-responsive gene expressing macrophages (MAC-IFNIC)</b> | Macrophages that express interferon-responsive genes (MAC-IFNIC). Showed strong upregulation of interferon (IFN)-induced genes including Ifit3, Ifit1 and Cxcl10. GO term analysis implicate responses to IFN $\alpha$ , $\beta$ , and $\gamma$ . Appear to arise from Ccr2+ M $\Phi$ as opposed to monocytes, and likely correspond to the recently described inflammatory M $\Phi$ subtype that has negative effects on heart repair after MI through promotion of inflammatory cell types, and cytokine and chemokine expression (King et al., 2017).                                                                                                                                                                                                                                |
| <b>Vascular populations</b>                                          |                                                                                                                                                                                                                                                                                                                                                                                                                                                                                                                                                                                                                                                                                                                                                                                         |
| <b>EC1</b>                                                           | The majority EC1 population (encompass the largest number of ECs at all time-points) express Ly6a (encodes SCA1) as well as the vascular transcription factor (TF) Sox17, and likely represents microvascular ECs.                                                                                                                                                                                                                                                                                                                                                                                                                                                                                                                                                                      |

|                                   |                                                                                                                                                                                                       |
|-----------------------------------|-------------------------------------------------------------------------------------------------------------------------------------------------------------------------------------------------------|
| <b>EC2</b>                        | EC2 expressed canonical arterial endothelial markers such as Bmx, Sema3g and Efnb2, as well as TF genes Sox17 and Hey1, the latter acting downstream of NOTCH which is required for arterial EC fate. |
| <b>EC3</b>                        | EC3 almost uniquely expressed venous EC marker Nr2f2 (encoding COUPTFII) and Von Willebrand factor (Vwf), and a minority (~3%) expressed Prox1 and Lyve1, consistent with a lymphatic identity.       |
| <b>Mural (contains pericytes)</b> | Mural cells which also encompass pericytes. Characterized as Cspg4+ Pdgfrb+, and a new lineage marker, Vtn, encoding Vitronectin, was specifically expressed in these mural cells                     |

**Supplemental Table 6:** All ECM1 specific cell expression metadata of interstitial cell populations. Data is separated by time-point post-MI and ranked by percentage of ECM1+ cells within each sub-population.<sup>3</sup>

| Rank | Cluster   | Condition | log<br>2_mean<br>ECM1<br>expression | ECM1+<br>Cell #                   | Total<br>Cell #         | % total cells<br>at time                         | % cells ECM1+                                    | ECM1+<br>cells as<br>% of<br>total<br>cells at<br>time          |
|------|-----------|-----------|-------------------------------------|-----------------------------------|-------------------------|--------------------------------------------------|--------------------------------------------------|-----------------------------------------------------------------|
| 1    | MYO       | Sham      | 2.2385                              | 22                                | 22                      | 0.3844                                           | 100.00                                           | 0.38                                                            |
| 2    | MAC8      | Sham      | 2.9702                              | 13                                | 13                      | 0.2272                                           | 100.00                                           | 0.23                                                            |
| 3    | F-SH      | Sham      | 2.7406                              | 576                               | 657                     | 11.4800                                          | 87.67                                            | 10.06                                                           |
| 4    | F-Act     | Sham      | 2.6191                              | 478                               | 553                     | 9.6628                                           | 86.44                                            | 8.35                                                            |
| 5    | F-WntX    | Sham      | 2.1573                              | 75                                | 96                      | 1.6774                                           | 78.13                                            | 1.31                                                            |
| 6    | M1MΦ      | Sham      | 1.4476                              | 2                                 | 3                       | 0.0524                                           | 66.67                                            | 0.03                                                            |
| 7    | MAC-IFNIC | Sham      | 0.9455                              | 2                                 | 3                       | 0.0524                                           | 66.67                                            | 0.03                                                            |
| 8    | F-SL      | Sham      | 1.8824                              | 879                               | 1348                    | 23.5541                                          | 65.21                                            | 15.36                                                           |
| 9    | M2MΦ      | Sham      | 1.0610                              | 15                                | 26                      | 0.4543                                           | 57.69                                            | 0.26                                                            |
| 10   | Mural     | Sham      | 1.5439                              | 79                                | 184                     | 3.2151                                           | 42.93                                            | 1.38                                                            |
| 11   | M1Mo      | Sham      | 0.8692                              | 15                                | 40                      | 0.6989                                           | 37.50                                            | 0.26                                                            |
| 12   | EC3       | Sham      | 1.2754                              | 69                                | 229                     | 4.0014                                           | 30.13                                            | 1.21                                                            |
| 13   | DC        | Sham      | 0.8125                              | 7                                 | 24                      | 0.4194                                           | 29.17                                            | 0.12                                                            |
| 14   | MAC-TR    | Sham      | 0.7461                              | 38                                | 159                     | 2.7783                                           | 23.90                                            | 0.66                                                            |
| 15   | EC2       | Sham      | 0.9342                              | 54                                | 241                     | 4.2111                                           | 22.41                                            | 0.94                                                            |
| 16   | Cyc       | Sham      | 0.6719                              | 8                                 | 37                      | 0.6465                                           | 21.62                                            | 0.14                                                            |
| 17   | Glial     | Sham      | 0.3270                              | 3                                 | 18                      | 0.3145                                           | 16.67                                            | 0.05                                                            |
| 18   | EC1       | Sham      | 0.6829                              | 188                               | 1215                    | 21.2301                                          | 15.47                                            | 3.28                                                            |
| 19   | MAC6      | Sham      | 0.5584                              | 5                                 | 33                      | 0.5766                                           | 15.15                                            | 0.09                                                            |
| 20   | TC1-Cd8   | Sham      | 0.4170                              | 23                                | 152                     | 2.6559                                           | 15.13                                            | 0.40                                                            |
| 21   | MAC7      | Sham      | 0.4016                              | 5                                 | 44                      | 0.7688                                           | 11.36                                            | 0.09                                                            |
| 22   | NKC       | Sham      | 0.4617                              | 4                                 | 48                      | 0.8387                                           | 8.33                                             | 0.07                                                            |
| 23   | TC2-Cd4   | Sham      | 0.2634                              | 10                                | 132                     | 2.3065                                           | 7.58                                             | 0.17                                                            |
| 24   | BC        | Sham      | 0.2678                              | 23                                | 446                     | 7.7931                                           | 5.16                                             | 0.40                                                            |
|      |           |           |                                     |                                   |                         |                                                  |                                                  |                                                                 |
|      |           |           | <b>Cell Group</b>                   | <b>total<br/>ECM1+<br/>Cell #</b> | <b>Total<br/>Cell #</b> | <b>Cell number<br/>as % of cells<br/>at time</b> | <b>ECM1+ cells<br/>as % of cells<br/>at time</b> | <b>% of<br/>"cell<br/>group"<br/>ECM1+<br/>at this<br/>time</b> |
|      |           |           |                                     | 2593                              | 5723                    |                                                  |                                                  |                                                                 |
|      |           |           | <b>Total<br/>Fibroblast</b>         | 2030                              | 2676                    | 46.7587                                          | 35.4709                                          | 75.8595                                                         |
|      |           |           | <b>Total<br/>Mo/MΦ</b>              | 95                                | 321                     | 5.6089                                           | 1.6600                                           | 29.5950                                                         |
|      |           |           | <b>Total<br/>EC</b>                 | 311                               | 1685                    | 29.4426                                          | 5.4342                                           | 18.4570                                                         |
|      |           |           |                                     |                                   |                         |                                                  |                                                  |                                                                 |
|      |           |           |                                     |                                   |                         |                                                  |                                                  |                                                                 |

| Rank | Cluster   | Condition | log<br>2_mean<br>ECM1<br>expression | ECM1+<br>Cell #                   | Total<br>Cell #         | % total cells<br>at time                         | % cells ECM1+                                    | ECM1+<br>cells as<br>% of<br>total<br>cells at<br>time    |
|------|-----------|-----------|-------------------------------------|-----------------------------------|-------------------------|--------------------------------------------------|--------------------------------------------------|-----------------------------------------------------------|
| 1    | MAC8      | MI-day 3  | 2.6895                              | 86                                | 106                     | 2.7355                                           | 81.13                                            | 2.22                                                      |
| 2    | MYO       | MI-day 3  | 2.1545                              | 3                                 | 4                       | 0.1032                                           | 75.00                                            | 0.08                                                      |
| 3    | F-SH      | MI-day 3  | 2.2669                              | 17                                | 25                      | 0.6452                                           | 68.00                                            | 0.44                                                      |
| 4    | F-SL      | MI-day 3  | 1.9149                              | 27                                | 40                      | 1.0323                                           | 67.5                                             | 0.70                                                      |
| 5    | M1MΦ      | MI-day 3  | 2.2011                              | 1288                              | 1964                    | 50.6839                                          | 65.58                                            | 33.24                                                     |
| 6    | M2MΦ      | MI-day 3  | 1.5824                              | 32                                | 49                      | 1.2645                                           | 65.31                                            | 0.83                                                      |
| 7    | F-WntX    | MI-day 3  | 1.6874                              | 5                                 | 8                       | 0.2065                                           | 62.50                                            | 0.13                                                      |
| 8    | MAC-IFNIC | MI-day 3  | 1.9108                              | 78                                | 125                     | 3.2258                                           | 62.40                                            | 2.01                                                      |
| 9    | F-Act     | MI-day 3  | 1.8295                              | 110                               | 185                     | 4.7742                                           | 59.46                                            | 2.84                                                      |
| 10   | Cyc       | MI-day 3  | 0.9515                              | 27                                | 71                      | 1.8323                                           | 38.03                                            | 0.70                                                      |
| 11   | M1Mo      | MI-day 3  | 1.0642                              | 151                               | 493                     | 12.7226                                          | 30.63                                            | 3.90                                                      |
| 12   | MAC6      | MI-day 3  | 1.0023                              | 30                                | 110                     | 2.8387                                           | 27.27                                            | 0.77                                                      |
| 13   | Mural     | MI-day 3  | 0.5939                              | 2                                 | 10                      | 0.2581                                           | 20.00                                            | 0.05                                                      |
| 14   | EC2       | MI-day 3  | 0.9353                              | 7                                 | 37                      | 0.9548                                           | 18.92                                            | 0.18                                                      |
| 15   | MAC-TR    | MI-day 3  | 0.4140                              | 4                                 | 23                      | 0.5935                                           | 17.39                                            | 0.10                                                      |
| 16   | EC3       | MI-day 3  | 0.6381                              | 13                                | 75                      | 1.9355                                           | 17.33                                            | 0.34                                                      |
| 17   | EC1       | MI-day 3  | 0.7319                              | 23                                | 162                     | 4.1806                                           | 14.20                                            | 0.59                                                      |
| 18   | MAC7      | MI-day 3  | 0.5208                              | 6                                 | 43                      | 1.1097                                           | 13.95                                            | 0.15                                                      |
| 19   | TC2-Cd4   | MI-day 3  | 0.7320                              | 2                                 | 16                      | 0.4129                                           | 12.50                                            | 0.05                                                      |
| 20   | TC1-Cd8   | MI-day 3  | 0.6388                              | 3                                 | 28                      | 0.7226                                           | 10.71                                            | 0.08                                                      |
| 21   | DC        | MI-day 3  | 0.2827                              | 23                                | 271                     | 6.9935                                           | 8.49                                             | 0.59                                                      |
| 22   | BC        | MI-day 3  | 0.6780                              | 2                                 | 27                      | 0.6968                                           | 7.41                                             | 0.05                                                      |
| 23   | NKC       | MI-day 3  | 0.0000                              | 0                                 | 2                       | 0.0516                                           | 0.00                                             | 0.00                                                      |
| 24   | Glial     | MI-day 3  | 0.0000                              | 0                                 | 1                       | 0.0258                                           | 0.00                                             | 0.00                                                      |
|      |           |           |                                     |                                   |                         |                                                  |                                                  |                                                           |
|      |           |           | <b>Cell Group</b>                   | <b>total<br/>ECM1+<br/>Cell #</b> | <b>Total<br/>Cell #</b> | <b>Cell number<br/>as % of cells<br/>at time</b> | <b>ECM1+ cells<br/>as % of cells<br/>at time</b> | <b>% of cell<br/>group<br/>ECM1+<br/>at this<br/>time</b> |
|      |           |           |                                     | 1939                              | 3875                    |                                                  |                                                  |                                                           |
|      |           |           | <b>Total<br/>Fibroblast</b>         | 162                               | 262                     | 6.7613                                           | 4.1806                                           | 61.8321                                                   |
|      |           |           | <b>Total<br/>Mo/MΦ</b>              | 1675                              | 2913                    | 75.1742                                          | 43.2258                                          | 57.5009                                                   |
|      |           |           | Total EC                            | 43                                | 274                     | 7.0710                                           | 1.1097                                           | 15.6934                                                   |
|      |           |           |                                     |                                   |                         |                                                  |                                                  |                                                           |
|      |           |           |                                     |                                   |                         |                                                  |                                                  |                                                           |
| Rank | Cluster   | Condition | log<br>2_mean<br>ECM1<br>expression | ECM1+<br>Cell #                   | Total<br>Cell #         | % total cells<br>at time                         | % cells ECM1+                                    | ECM1+<br>cells as<br>% of<br>total                        |



|    |           |          |                         |                           |                     |                                          |                                          |                                           |
|----|-----------|----------|-------------------------|---------------------------|---------------------|------------------------------------------|------------------------------------------|-------------------------------------------|
|    |           |          |                         |                           |                     |                                          |                                          | <b>cells at time</b>                      |
| 1  | MAC8      | MI-day 7 | 2.3424                  | 18                        | 18                  | 0.4822                                   | 100.00                                   | 0.48                                      |
| 2  | F-WntX    | MI-day 7 | 2.3388                  | 13                        | 15                  | 0.4018                                   | 86.67                                    | 0.35                                      |
| 3  | MYO       | MI-day 7 | 1.7450                  | 371                       | 429                 | 11.4921                                  | 86.48                                    | 9.94                                      |
| 4  | F-SH      | MI-day 7 | 2.5415                  | 142                       | 172                 | 4.6076                                   | 82.56                                    | 3.80                                      |
| 5  | F-Act     | MI-day 7 | 2.1699                  | 301                       | 368                 | 9.8580                                   | 81.79                                    | 8.06                                      |
| 6  | F-SL      | MI-day 7 | 1.9019                  | 189                       | 265                 | 7.0988                                   | 71.32                                    | 5.06                                      |
| 7  | M1MΦ      | MI-day 7 | 1.6169                  | 80                        | 134                 | 3.5896                                   | 59.70                                    | 2.14                                      |
| 8  | Mural     | MI-day 7 | 1.4421                  | 21                        | 39                  | 1.0447                                   | 53.85                                    | 0.56                                      |
| 9  | MAC-IFNIC | MI-day 7 | 1.1206                  | 14                        | 27                  | 0.7233                                   | 51.85                                    | 0.38                                      |
| 10 | M2MΦ      | MI-day 7 | 1.0189                  | 304                       | 600                 | 16.0729                                  | 50.67                                    | 8.14                                      |
| 11 | EC3       | MI-day 7 | 0.9763                  | 30                        | 102                 | 2.7324                                   | 29.41                                    | 0.80                                      |
| 12 | Cyc       | MI-day 7 | 0.3901                  | 27                        | 108                 | 2.8931                                   | 25.00                                    | 0.72                                      |
| 13 | EC2       | MI-day 7 | 0.8343                  | 22                        | 95                  | 2.5449                                   | 23.16                                    | 0.59                                      |
| 14 | M1Mo      | MI-day 7 | 0.5625                  | 17                        | 79                  | 2.1163                                   | 21.52                                    | 0.46                                      |
| 15 | MAC-TR    | MI-day 7 | 0.7385                  | 9                         | 55                  | 1.4733                                   | 16.36                                    | 0.24                                      |
| 16 | EC1       | MI-day 7 | 0.4262                  | 64                        | 503                 | 13.4744                                  | 12.72                                    | 1.71                                      |
| 17 | MAC6      | MI-day 7 | 0.3280                  | 3                         | 26                  | 0.6965                                   | 11.54                                    | 0.08                                      |
| 18 | DC        | MI-day 7 | 0.1570                  | 9                         | 96                  | 2.5717                                   | 9.38                                     | 0.24                                      |
| 19 | NKC       | MI-day 7 | 0.1701                  | 2                         | 26                  | 0.6965                                   | 7.69                                     | 0.05                                      |
| 20 | TC2-Cd4   | MI-day 7 | 0.2790                  | 6                         | 95                  | 2.5449                                   | 6.32                                     | 0.16                                      |
| 21 | TC1-Cd8   | MI-day 7 | 0.1440                  | 7                         | 144                 | 3.8575                                   | 4.86                                     | 0.19                                      |
| 22 | BC        | MI-day 7 | 0.0517                  | 6                         | 278                 | 7.4471                                   | 2.16                                     | 0.16                                      |
| 23 | MAC7      | MI-day 7 | 0.0472                  | 1                         | 54                  | 1.4466                                   | 1.85                                     | 0.03                                      |
| 24 | Glial     | MI-day 7 | 0.0000                  | 0                         | 5                   | 0.1339                                   | 0.00                                     | 0.00                                      |
|    |           |          |                         |                           |                     |                                          |                                          |                                           |
|    |           |          | <b>Cell Group</b>       | <b>total ECM1+ Cell #</b> | <b>Total Cell #</b> | <b>Cell number as % of cells at time</b> | <b>ECM1+ cells as % of cells at time</b> | <b>% of cell group ECM1+ at this time</b> |
|    |           |          |                         | 1656                      | 3733                |                                          |                                          |                                           |
|    |           |          | <b>Total Fibroblast</b> | 1016                      | 1249                | 33.4583                                  | 27.2167                                  | 81.3451                                   |
|    |           |          | <b>Total Mo/MΦ</b>      | 446                       | 993                 | 26.6006                                  | 11.9475                                  | 44.9144                                   |
|    |           |          | <b>Total EC</b>         | 116                       | 700                 | 18.7517                                  | 3.1074                                   | 16.5714                                   |

**Supplemental Table 7:** Per-cell Spearman correlation analysis of ECM1 expression against all genes in the mouse scRNAseq dataset.<sup>3</sup>

| Rank | Gene name | Spearman_rho | FDR adj. p-value |
|------|-----------|--------------|------------------|
| n/a  | Ecm1      | 1.000        | 0                |
| 1    | Lgals1    | 0.441        | 0                |
| 2    | Lrp1      | 0.435        | 0                |
| 3    | Rnase4    | 0.421        | 0                |
| 4    | S100a6    | 0.402        | 0                |
| 5    | Ctsl      | 0.397        | 0                |
| 6    | Pcolce2   | 0.392        | 0                |
| 7    | Dpt       | 0.389        | 0                |
| 8    | Timp2     | 0.388        | 0                |
| 9    | Cfh       | 0.386        | 0                |
| 10   | Fbln1     | 0.381        | 0                |
| 11   | Fxyd1     | 0.378        | 0                |
| 12   | Serping1  | 0.377        | 0                |
| 13   | Ccdc80    | 0.377        | 0                |
| 14   | Entpd2    | 0.372        | 0                |
| 15   | Ptgis     | 0.371        | 0                |
| 16   | Islr      | 0.371        | 0                |
| 17   | Col1a1    | 0.365        | 0                |
| 18   | Cd63      | 0.365        | 0                |
| 19   | Mfap5     | 0.364        | 0                |
| 20   | Col6a1    | 0.362        | 0                |
| 21   | Serpinf1  | 0.361        | 0                |
| 22   | Meg3      | 0.360        | 0                |
| 23   | H2B-EGFP  | 0.358        | 0                |
| 24   | Col1a2    | 0.357        | 0                |
| 25   | Fstl1     | 0.356        | 0                |
| 26   | Loxl1     | 0.356        | 0                |
| 27   | Sod3      | 0.355        | 0                |
| 28   | Sdc2      | 0.355        | 0                |
| 29   | Igfbp6    | 0.355        | 0                |
| 30   | Sfrp1     | 0.354        | 0                |
| 31   | Medag     | 0.352        | 0                |
| 32   | Pmp22     | 0.352        | 0                |
| 33   | Lum       | 0.351        | 0                |
| 34   | Cygb      | 0.351        | 0                |
| 35   | Col6a2    | 0.350        | 0                |
| 36   | Ogn       | 0.349        | 0                |
| 37   | Mmp2      | 0.349        | 0                |
| 38   | Tnxb      | 0.348        | 0                |
| 39   | Clec3b    | 0.348        | 0                |
| 40   | Ahnak2    | 0.346        | 0                |
| 41   | Mxra8     | 0.346        | 0                |

|    |          |       |            |
|----|----------|-------|------------|
| 42 | Serpine2 | 0.346 | 0          |
| 43 | Htra3    | 0.345 | 0          |
| 44 | Axl      | 0.345 | 0          |
| 45 | Lhfp     | 0.344 | 0          |
| 46 | Gas1     | 0.344 | 0          |
| 47 | Prelp    | 0.343 | 0          |
| 48 | Adamts2  | 0.343 | 0          |
| 49 | Gpx3     | 0.342 | 0          |
| 50 | Cpq      | 0.338 | 0          |
| 51 | Emp1     | 0.338 | 0          |
| 52 | Olfml3   | 0.338 | 0          |
| 53 | Rcn3     | 0.337 | 0          |
| 54 | Lpar1    | 0.335 | 0          |
| 55 | Anxa1    | 0.335 | 0          |
| 56 | Pcolce   | 0.335 | 0          |
| 57 | Rbp1     | 0.334 | 0          |
| 58 | Nbl1     | 0.333 | 0          |
| 59 | Igfbp4   | 0.333 | 0          |
| 60 | Bgn      | 0.333 | 0          |
| 61 | Rarres2  | 0.333 | 0          |
| 62 | Fhl1     | 0.332 | 0          |
| 63 | Gpm6b    | 0.331 | 0          |
| 64 | Col3a1   | 0.330 | 0          |
| 65 | Vcan     | 0.329 | 0          |
| 66 | Mmp23    | 0.327 | 0          |
| 67 | Camk2n1  | 0.325 | 0          |
| 68 | Nupr1    | 0.324 | 3.95xE-323 |
| 69 | Pdlim2   | 0.323 | 7.39xE-321 |
| 70 | Fbn1     | 0.322 | 2.07xE-318 |
| 71 | Oaf      | 0.320 | 6.26xE-315 |
| 72 | Nfix     | 0.320 | 1.07xE-314 |
| 73 | Ugp2     | 0.320 | 1.79xE-314 |
| 74 | Pam      | 0.317 | 0.00xE+00  |
| 75 | Qpct     | 0.317 | 3.96xE-308 |
| 76 | Pcsk6    | 0.317 | 6.49xE-308 |
| 77 | Gsn      | 0.316 | 3.38xE-307 |
| 78 | Gfpt2    | 0.316 | 5.60xE-307 |
| 79 | Aspn     | 0.315 | 1.37xE-305 |
| 80 | Bicc1    | 0.315 | 4.27xE-304 |
| 81 | Fbln2    | 0.314 | 3.02xE-303 |
| 82 | Cryab    | 0.313 | 2.23xE-301 |
| 83 | Aebp1    | 0.312 | 2.36xE-298 |
| 84 | Selenbp1 | 0.311 | 3.79xE-296 |
| 85 | Cp       | 0.311 | 7.29xE-296 |

|     |          |       |            |
|-----|----------|-------|------------|
| 86  | Itgb5    | 0.311 | 8.03xE-296 |
| 87  | Crispld2 | 0.310 | 1.43xE-295 |
| 88  | Smoc2    | 0.309 | 2.66xE-293 |
| 89  | Abca8a   | 0.309 | 5.44xE-293 |
| 90  | Lama2    | 0.309 | 1.17xE-292 |
| 91  | Tcf21    | 0.308 | 1.77xE-291 |
| 92  | Matn2    | 0.308 | 2.81xE-290 |
| 93  | Dpep1    | 0.308 | 4.57xE-290 |
| 94  | Adamts5  | 0.305 | 1.40xE-284 |
| 95  | Pi16     | 0.304 | 1.37xE-282 |
| 96  | Mt1      | 0.304 | 4.06xE-282 |
| 97  | Cd248    | 0.302 | 4.44xE-279 |
| 98  | Cd302    | 0.302 | 1.00xE-278 |
| 99  | Pdgfra   | 0.301 | 8.41xE-278 |
| 100 | Lamc1    | 0.301 | 1.62xE-277 |
| 101 | Snhg18   | 0.301 | 1.28xE-276 |
| 102 | Emp3     | 0.300 | 2.00xE-274 |

**Supplemental Table 8: GOnet/DICE GOBP enrichment of the top ECM1 Spearman correlated genes ( $r \geq 0.3$ ) from the mouse scRNAseq dataset.<sup>3</sup>**

|    | GO_term_ID | GO_term_def                                             | P        | P_FDR_adj | NofGenes |
|----|------------|---------------------------------------------------------|----------|-----------|----------|
| 1  | GO:0030198 | extracellular matrix organization                       | 5.23E-18 | 0         | 18       |
| 2  | GO:0043062 | extracellular structure organization                    | 5.28E-17 | 0         | 18       |
| 3  | GO:0048513 | animal organ development                                | 1.00E-09 | 3.08E-06  | 37       |
| 4  | GO:0030199 | collagen fibril organization                            | 1.20E-09 | 3.08E-06  | 7        |
| 5  | GO:0048731 | system development                                      | 1.40E-09 | 3.08E-06  | 44       |
| 6  | GO:0032502 | developmental process                                   | 2.50E-09 | 4.14E-06  | 51       |
| 7  | GO:0007275 | multicellular organism development                      | 3.10E-09 | 4.14E-06  | 47       |
| 8  | GO:0048856 | anatomical structure development                        | 3.40E-09 | 4.14E-06  | 49       |
| 9  | GO:0032963 | collagen metabolic process                              | 3.50E-09 | 4.14E-06  | 7        |
| 10 | GO:0009888 | tissue development                                      | 3.80E-09 | 4.14E-06  | 26       |
| 11 | GO:0007155 | cell adhesion                                           | 2.32E-08 | 2.30E-05  | 17       |
| 12 | GO:0022610 | biological adhesion                                     | 2.84E-08 | 2.58E-05  | 17       |
| 13 | GO:0009611 | response to wounding                                    | 5.48E-08 | 4.59E-05  | 12       |
| 14 | GO:0032060 | bleb assembly                                           | 8.59E-08 | 6.69E-05  | 4        |
| 15 | GO:0030334 | regulation of cell migration                            | 1.26E-07 | 8.79E-05  | 17       |
| 16 | GO:0030155 | regulation of cell adhesion                             | 1.34E-07 | 8.79E-05  | 15       |
| 17 | GO:0001501 | skeletal system development                             | 1.37E-07 | 8.79E-05  | 13       |
| 18 | GO:0051270 | regulation of cellular component movement               | 1.81E-07 | 1.10E-04  | 18       |
| 19 | GO:0042060 | wound healing                                           | 1.95E-07 | 1.12E-04  | 10       |
| 20 | GO:2000145 | regulation of cell motility                             | 2.60E-07 | 1.42E-04  | 17       |
| 21 | GO:0009966 | regulation of signal transduction                       | 4.47E-07 | 2.32E-04  | 30       |
| 22 | GO:0040012 | regulation of locomotion                                | 8.00E-07 | 3.97E-04  | 17       |
| 23 | GO:0070208 | protein heterotrimerization                             | 9.84E-07 | 4.66E-04  | 4        |
| 24 | GO:0016043 | cellular component organization                         | 1.19E-06 | 5.25E-04  | 43       |
| 25 | GO:0048583 | regulation of response to stimulus                      | 1.20E-06 | 5.25E-04  | 36       |
| 26 | GO:0051241 | negative regulation of multicellular organismal process | 1.97E-06 | 8.25E-04  | 19       |
| 27 | GO:0010646 | regulation of cell communication                        | 2.22E-06 | 8.98E-04  | 32       |
| 28 | GO:2000146 | negative regulation of cell motility                    | 2.41E-06 | 9.22E-04  | 9        |
| 29 | GO:0023051 | regulation of signaling                                 | 2.45E-06 | 9.22E-04  | 32       |
| 30 | GO:0010810 | regulation of cell-substrate adhesion                   | 2.60E-06 | 9.43E-04  | 8        |
| 31 | GO:0022008 | neurogenesis                                            | 2.70E-06 | 9.43E-04  | 22       |
| 32 | GO:0097435 | supramolecular fiber organization                       | 2.77E-06 | 9.43E-04  | 11       |
| 33 | GO:0071840 | cellular component organization or biogenesis           | 3.22E-06 | 1.06E-03  | 43       |
| 34 | GO:0051239 | regulation of multicellular organismal process          | 3.74E-06 | 1.20E-03  | 31       |
| 35 | GO:0042221 | response to chemical                                    | 3.94E-06 | 1.23E-03  | 34       |
| 36 | GO:0040007 | growth                                                  | 4.34E-06 | 1.31E-03  | 11       |
| 37 | GO:0048585 | negative regulation of response to stimulus             | 5.49E-06 | 1.58E-03  | 20       |
| 38 | GO:0060346 | bone trabecula formation                                | 5.52E-06 | 1.58E-03  | 3        |
| 39 | GO:0031589 | cell-substrate adhesion                                 | 5.85E-06 | 1.59E-03  | 7        |

|    |            |                                                                       |          |          |    |
|----|------------|-----------------------------------------------------------------------|----------|----------|----|
| 40 | GO:0040011 | locomotion                                                            | 5.86E-06 | 1.59E-03 | 17 |
| 41 | GO:0051271 | negative regulation of cellular component movement                    | 6.25E-06 | 1.59E-03 | 9  |
| 42 | GO:2000026 | regulation of multicellular organismal development                    | 6.25E-06 | 1.59E-03 | 24 |
| 43 | GO:0030162 | regulation of proteolysis                                             | 6.27E-06 | 1.59E-03 | 13 |
| 44 | GO:0050817 | coagulation                                                           | 6.89E-06 | 1.67E-03 | 6  |
| 45 | GO:0007596 | blood coagulation                                                     | 6.89E-06 | 1.67E-03 | 6  |
| 46 | GO:0048523 | negative regulation of cellular process                               | 7.18E-06 | 1.70E-03 | 38 |
| 47 | GO:0007599 | hemostasis                                                            | 7.63E-06 | 1.77E-03 | 6  |
| 48 | GO:0048869 | cellular developmental process                                        | 8.51E-06 | 1.93E-03 | 34 |
| 49 | GO:0040013 | negative regulation of locomotion                                     | 9.28E-06 | 2.07E-03 | 9  |
| 50 | GO:0050793 | regulation of developmental process                                   | 9.63E-06 | 2.10E-03 | 27 |
| 51 | GO:0030154 | cell differentiation                                                  | 1.09E-05 | 2.33E-03 | 33 |
| 52 | GO:0009653 | anatomical structure morphogenesis                                    | 1.13E-05 | 2.34E-03 | 24 |
| 53 | GO:0048608 | reproductive structure development                                    | 1.15E-05 | 2.34E-03 | 10 |
| 54 | GO:0032501 | multicellular organismal process                                      | 1.16E-05 | 2.34E-03 | 52 |
| 55 | GO:0048705 | skeletal system morphogenesis                                         | 1.20E-05 | 2.34E-03 | 8  |
| 56 | GO:0045861 | negative regulation of proteolysis                                    | 1.20E-05 | 2.34E-03 | 9  |
| 57 | GO:0061458 | reproductive system development                                       | 1.25E-05 | 2.39E-03 | 10 |
| 58 | GO:0030336 | negative regulation of cell migration                                 | 1.49E-05 | 2.81E-03 | 8  |
| 59 | GO:0090287 | regulation of cellular response to growth factor stimulus             | 1.62E-05 | 2.99E-03 | 8  |
| 60 | GO:0061430 | bone trabecula morphogenesis                                          | 1.86E-05 | 3.37E-03 | 3  |
| 61 | GO:0048519 | negative regulation of biological process                             | 2.08E-05 | 3.71E-03 | 40 |
| 62 | GO:0060325 | face morphogenesis                                                    | 2.17E-05 | 3.82E-03 | 4  |
| 63 | GO:0000904 | cell morphogenesis involved in differentiation                        | 2.68E-05 | 4.58E-03 | 11 |
| 64 | GO:0045595 | regulation of cell differentiation                                    | 2.70E-05 | 4.58E-03 | 21 |
| 65 | GO:0032101 | regulation of response to external stimulus                           | 2.73E-05 | 4.58E-03 | 14 |
| 66 | GO:0035295 | tube development                                                      | 3.14E-05 | 5.19E-03 | 14 |
| 67 | GO:0003414 | chondrocyte morphogenesis involved in endochondral bone morphogenesis | 3.60E-05 | 5.69E-03 | 3  |
| 68 | GO:0003429 | growth plate cartilage chondrocyte morphogenesis                      | 3.60E-05 | 5.69E-03 | 3  |
| 69 | GO:0090171 | chondrocyte morphogenesis                                             | 3.60E-05 | 5.69E-03 | 3  |
| 70 | GO:0060323 | head morphogenesis                                                    | 3.81E-05 | 5.93E-03 | 4  |
| 71 | GO:0016477 | cell migration                                                        | 4.05E-05 | 6.22E-03 | 13 |
| 72 | GO:0003422 | growth plate cartilage morphogenesis                                  | 4.36E-05 | 6.52E-03 | 3  |
| 73 | GO:0042063 | gliogenesis                                                           | 4.37E-05 | 6.52E-03 | 7  |
| 74 | GO:0051336 | regulation of hydrolase activity                                      | 4.51E-05 | 6.64E-03 | 14 |
| 75 | GO:0048699 | generation of neurons                                                 | 4.74E-05 | 6.75E-03 | 19 |
| 76 | GO:0060351 | cartilage development involved in endochondral bone morphogenesis     | 4.90E-05 | 6.75E-03 | 4  |
| 77 | GO:0052547 | regulation of peptidase activity                                      | 4.96E-05 | 6.75E-03 | 9  |

|     |            |                                                                                                 |          |          |    |
|-----|------------|-------------------------------------------------------------------------------------------------|----------|----------|----|
| 78  | GO:0072275 | metanephric glomerulus morphogenesis                                                            | 4.98E-05 | 6.75E-03 | 2  |
| 79  | GO:0072276 | metanephric glomerulus vasculature morphogenesis                                                | 4.98E-05 | 6.75E-03 | 2  |
| 80  | GO:0072277 | metanephric glomerular capillary formation                                                      | 4.98E-05 | 6.75E-03 | 2  |
| 81  | GO:0030510 | regulation of BMP signaling pathway                                                             | 5.01E-05 | 6.75E-03 | 5  |
| 82  | GO:0032989 | cellular component morphogenesis                                                                | 5.15E-05 | 6.84E-03 | 13 |
| 83  | GO:0032268 | regulation of cellular protein metabolic process                                                | 5.63E-05 | 7.33E-03 | 24 |
| 84  | GO:0051128 | regulation of cellular component organization                                                   | 5.70E-05 | 7.33E-03 | 24 |
| 85  | GO:0006950 | response to stress                                                                              | 5.76E-05 | 7.33E-03 | 28 |
| 86  | GO:0032879 | regulation of localization                                                                      | 5.78E-05 | 7.33E-03 | 26 |
| 87  | GO:0085029 | extracellular matrix assembly                                                                   | 6.18E-05 | 7.60E-03 | 3  |
| 88  | GO:0000302 | response to reactive oxygen species                                                             | 6.18E-05 | 7.60E-03 | 6  |
| 89  | GO:0000902 | cell morphogenesis                                                                              | 6.21E-05 | 7.60E-03 | 12 |
| 90  | GO:0010466 | negative regulation of peptidase activity                                                       | 6.36E-05 | 7.71E-03 | 7  |
| 91  | GO:0030514 | negative regulation of BMP signaling pathway                                                    | 6.68E-05 | 7.92E-03 | 4  |
| 92  | GO:0010517 | regulation of phospholipase activity                                                            | 6.68E-05 | 7.92E-03 | 4  |
| 93  | GO:0006979 | response to oxidative stress                                                                    | 7.42E-05 | 8.69E-03 | 8  |
| 94  | GO:0071230 | cellular response to amino acid stimulus                                                        | 7.78E-05 | 9.02E-03 | 6  |
| 95  | GO:0009887 | animal organ morphogenesis                                                                      | 8.62E-05 | 9.89E-03 | 14 |
| 96  | GO:0010171 | body morphogenesis                                                                              | 8.90E-05 | 1.01E-02 | 4  |
| 97  | GO:0010951 | negative regulation of endopeptidase activity                                                   | 9.40E-05 | 1.06E-02 | 6  |
| 98  | GO:1903034 | regulation of response to wounding                                                              | 9.69E-05 | 1.06E-02 | 6  |
| 99  | GO:0003418 | growth plate cartilage chondrocyte differentiation                                              | 9.73E-05 | 1.06E-02 | 3  |
| 100 | GO:0003433 | chondrocyte development involved in endochondral bone morphogenesis                             | 9.73E-05 | 1.06E-02 | 3  |
| 101 | GO:0097350 | neutrophil clearance                                                                            | 9.93E-05 | 1.06E-02 | 2  |
| 102 | GO:0035582 | sequestering of BMP in extracellular matrix                                                     | 9.93E-05 | 1.06E-02 | 2  |
| 103 | GO:0090101 | negative regulation of transmembrane receptor protein serine/threonine kinase signaling pathway | 1.04E-04 | 1.10E-02 | 5  |
| 104 | GO:0060324 | face development                                                                                | 1.09E-04 | 1.14E-02 | 4  |
| 105 | GO:0008285 | negative regulation of cell population proliferation                                            | 1.11E-04 | 1.15E-02 | 11 |
| 106 | GO:0034614 | cellular response to reactive oxygen species                                                    | 1.13E-04 | 1.16E-02 | 5  |
| 107 | GO:0010812 | negative regulation of cell-substrate adhesion                                                  | 1.16E-04 | 1.17E-02 | 4  |
| 108 | GO:0043200 | response to amino acid                                                                          | 1.16E-04 | 1.17E-02 | 6  |
| 109 | GO:0120036 | plasma membrane bounded cell projection organization                                            | 1.18E-04 | 1.18E-02 | 14 |
| 110 | GO:0048589 | developmental growth                                                                            | 1.21E-04 | 1.20E-02 | 9  |

|     |            |                                                                         |          |          |    |
|-----|------------|-------------------------------------------------------------------------|----------|----------|----|
| 111 | GO:0070206 | protein trimerization                                                   | 1.24E-04 | 1.22E-02 | 4  |
| 112 | GO:0007399 | nervous system development                                              | 1.33E-04 | 1.30E-02 | 22 |
| 113 | GO:0048565 | digestive tract development                                             | 1.38E-04 | 1.33E-02 | 5  |
| 114 | GO:0070613 | regulation of protein processing                                        | 1.40E-04 | 1.33E-02 | 4  |
| 115 | GO:0070887 | cellular response to chemical stimulus                                  | 1.41E-04 | 1.33E-02 | 24 |
| 116 | GO:0060343 | trabecula formation                                                     | 1.44E-04 | 1.34E-02 | 3  |
| 117 | GO:0046688 | response to copper ion                                                  | 1.44E-04 | 1.34E-02 | 3  |
| 118 | GO:0060284 | regulation of cell development                                          | 1.50E-04 | 1.37E-02 | 14 |
| 119 | GO:1901701 | cellular response to oxygen-containing compound                         | 1.50E-04 | 1.37E-02 | 14 |
| 120 | GO:0030308 | negative regulation of cell growth                                      | 1.51E-04 | 1.37E-02 | 6  |
| 121 | GO:1903317 | regulation of protein maturation                                        | 1.58E-04 | 1.41E-02 | 4  |
| 122 | GO:0051674 | localization of cell                                                    | 1.59E-04 | 1.41E-02 | 13 |
| 123 | GO:0048870 | cell motility                                                           | 1.59E-04 | 1.41E-02 | 13 |
| 124 | GO:0006928 | movement of cell or subcellular component                               | 1.63E-04 | 1.43E-02 | 16 |
| 125 | GO:0036072 | direct ossification                                                     | 1.65E-04 | 1.43E-02 | 2  |
| 126 | GO:0001957 | intramembranous ossification                                            | 1.65E-04 | 1.43E-02 | 2  |
| 127 | GO:0007162 | negative regulation of cell adhesion                                    | 1.72E-04 | 1.48E-02 | 7  |
| 128 | GO:0051246 | regulation of protein metabolic process                                 | 1.79E-04 | 1.53E-02 | 24 |
| 129 | GO:0060536 | cartilage morphogenesis                                                 | 1.82E-04 | 1.54E-02 | 3  |
| 130 | GO:0050866 | negative regulation of cell activation                                  | 1.93E-04 | 1.61E-02 | 6  |
| 131 | GO:0010721 | negative regulation of cell development                                 | 1.96E-04 | 1.62E-02 | 8  |
| 132 | GO:0043933 | protein-containing complex subunit organization                         | 1.96E-04 | 1.62E-02 | 17 |
| 133 | GO:0030030 | cell projection organization                                            | 1.98E-04 | 1.62E-02 | 14 |
| 134 | GO:0019222 | regulation of metabolic process                                         | 2.00E-04 | 1.63E-02 | 41 |
| 135 | GO:0061061 | muscle structure development                                            | 2.12E-04 | 1.71E-02 | 9  |
| 136 | GO:0055123 | digestive system development                                            | 2.23E-04 | 1.78E-02 | 5  |
| 137 | GO:0003413 | chondrocyte differentiation involved in endochondral bone morphogenesis | 2.26E-04 | 1.80E-02 | 3  |
| 138 | GO:0060191 | regulation of lipase activity                                           | 2.33E-04 | 1.84E-02 | 4  |
| 139 | GO:0051346 | negative regulation of hydrolase activity                               | 2.37E-04 | 1.86E-02 | 8  |
| 140 | GO:0009605 | response to external stimulus                                           | 2.43E-04 | 1.88E-02 | 22 |
| 141 | GO:0072103 | glomerulus vasculature morphogenesis                                    | 2.47E-04 | 1.88E-02 | 2  |
| 142 | GO:0072239 | metanephric glomerulus vasculature development                          | 2.47E-04 | 1.88E-02 | 2  |
| 143 | GO:0072104 | glomerular capillary formation                                          | 2.47E-04 | 1.88E-02 | 2  |
| 144 | GO:0031323 | regulation of cellular metabolic process                                | 2.51E-04 | 1.90E-02 | 38 |
| 145 | GO:0080090 | regulation of primary metabolic process                                 | 2.58E-04 | 1.93E-02 | 37 |
| 146 | GO:0060350 | endochondral bone morphogenesis                                         | 2.59E-04 | 1.93E-02 | 4  |
| 147 | GO:0030324 | lung development                                                        | 2.62E-04 | 1.95E-02 | 6  |
| 148 | GO:0030323 | respiratory tube development                                            | 2.83E-04 | 2.08E-02 | 6  |



|     |            |                                                                                        |          |          |    |
|-----|------------|----------------------------------------------------------------------------------------|----------|----------|----|
| 149 | GO:0061041 | regulation of wound healing                                                            | 2.92E-04 | 2.13E-02 | 5  |
| 150 | GO:0001503 | ossification                                                                           | 2.97E-04 | 2.16E-02 | 6  |
| 151 | GO:0045785 | positive regulation of cell adhesion                                                   | 2.98E-04 | 2.16E-02 | 8  |
| 152 | GO:0050680 | negative regulation of epithelial cell proliferation                                   | 3.01E-04 | 2.16E-02 | 5  |
| 153 | GO:0030574 | collagen catabolic process                                                             | 3.04E-04 | 2.17E-02 | 3  |
| 154 | GO:0090288 | negative regulation of cellular response to growth factor stimulus                     | 3.11E-04 | 2.20E-02 | 5  |
| 155 | GO:0051171 | regulation of nitrogen compound metabolic process                                      | 3.18E-04 | 2.23E-02 | 36 |
| 156 | GO:0009968 | negative regulation of signal transduction                                             | 3.22E-04 | 2.25E-02 | 14 |
| 157 | GO:0071310 | cellular response to organic substance                                                 | 3.33E-04 | 2.29E-02 | 20 |
| 158 | GO:0048566 | embryonic digestive tract development                                                  | 3.34E-04 | 2.29E-02 | 3  |
| 159 | GO:0003417 | growth plate cartilage development                                                     | 3.34E-04 | 2.29E-02 | 3  |
| 160 | GO:0071694 | maintenance of protein location in extracellular region                                | 3.45E-04 | 2.32E-02 | 2  |
| 161 | GO:0061439 | kidney vasculature morphogenesis                                                       | 3.45E-04 | 2.32E-02 | 2  |
| 162 | GO:0061438 | renal system vasculature morphogenesis                                                 | 3.45E-04 | 2.32E-02 | 2  |
| 163 | GO:0009636 | response to toxic substance                                                            | 3.48E-04 | 2.33E-02 | 7  |
| 164 | GO:0060255 | regulation of macromolecule metabolic process                                          | 3.55E-04 | 2.36E-02 | 38 |
| 165 | GO:0050790 | regulation of catalytic activity                                                       | 3.59E-04 | 2.37E-02 | 18 |
| 166 | GO:0030335 | positive regulation of cell migration                                                  | 3.78E-04 | 2.48E-02 | 9  |
| 167 | GO:0065009 | regulation of molecular function                                                       | 3.90E-04 | 2.54E-02 | 22 |
| 168 | GO:0001558 | regulation of cell growth                                                              | 4.03E-04 | 2.61E-02 | 8  |
| 169 | GO:0001655 | urogenital system development                                                          | 4.11E-04 | 2.64E-02 | 7  |
| 170 | GO:0090092 | regulation of transmembrane receptor protein serine/threonine kinase signaling pathway | 4.12E-04 | 2.64E-02 | 6  |
| 171 | GO:0071417 | cellular response to organonitrogen compound                                           | 4.15E-04 | 2.65E-02 | 9  |
| 172 | GO:0072224 | metanephric glomerulus development                                                     | 4.59E-04 | 2.91E-02 | 2  |
| 173 | GO:0048518 | positive regulation of biological process                                              | 4.72E-04 | 2.97E-02 | 41 |
| 174 | GO:0043086 | negative regulation of catalytic activity                                              | 4.73E-04 | 2.97E-02 | 10 |
| 175 | GO:0052548 | regulation of endopeptidase activity                                                   | 4.83E-04 | 3.01E-02 | 7  |
| 176 | GO:0031214 | biomineral tissue development                                                          | 4.98E-04 | 3.06E-02 | 4  |
| 177 | GO:0110148 | biomineralization                                                                      | 4.98E-04 | 3.06E-02 | 4  |
| 178 | GO:2000147 | positive regulation of cell motility                                                   | 5.04E-04 | 3.09E-02 | 9  |
| 179 | GO:0051094 | positive regulation of developmental process                                           | 5.22E-04 | 3.18E-02 | 16 |
| 180 | GO:0060541 | respiratory system development                                                         | 5.48E-04 | 3.32E-02 | 6  |
| 181 | GO:0031175 | neuron projection development                                                          | 5.86E-04 | 3.48E-02 | 10 |
| 182 | GO:0035581 | sequestering of extracellular ligand from receptor                                     | 5.88E-04 | 3.48E-02 | 2  |
| 183 | GO:0032964 | collagen biosynthetic process                                                          | 5.88E-04 | 3.48E-02 | 2  |
| 184 | GO:0032429 | regulation of phospholipase A2 activity                                                | 5.88E-04 | 3.48E-02 | 2  |

|     |            |                                                          |          |          |    |
|-----|------------|----------------------------------------------------------|----------|----------|----|
| 185 | GO:0003416 | endochondral bone growth                                 | 5.92E-04 | 3.48E-02 | 3  |
| 186 | GO:0006508 | proteolysis                                              | 5.93E-04 | 3.48E-02 | 13 |
| 187 | GO:0042542 | response to hydrogen peroxide                            | 6.12E-04 | 3.57E-02 | 4  |
| 188 | GO:0010035 | response to inorganic substance                          | 6.18E-04 | 3.58E-02 | 8  |
| 189 | GO:0002063 | chondrocyte development                                  | 6.37E-04 | 3.67E-02 | 3  |
| 190 | GO:0051272 | positive regulation of cellular component movement       | 6.40E-04 | 3.67E-02 | 9  |
| 191 | GO:0008347 | glial cell migration                                     | 6.84E-04 | 3.90E-02 | 3  |
| 192 | GO:0045926 | negative regulation of growth                            | 6.88E-04 | 3.91E-02 | 6  |
| 193 | GO:0051259 | protein complex oligomerization                          | 7.05E-04 | 3.98E-02 | 9  |
| 194 | GO:0043588 | skin development                                         | 7.31E-04 | 4.06E-02 | 6  |
| 195 | GO:0098868 | bone growth                                              | 7.33E-04 | 4.06E-02 | 3  |
| 196 | GO:1900115 | extracellular regulation of signal transduction          | 7.33E-04 | 4.06E-02 | 2  |
| 197 | GO:1900116 | extracellular negative regulation of signal transduction | 7.33E-04 | 4.06E-02 | 2  |
| 198 | GO:0010243 | response to organonitrogen compound                      | 7.37E-04 | 4.06E-02 | 11 |
| 199 | GO:0040017 | positive regulation of locomotion                        | 7.49E-04 | 4.10E-02 | 9  |
| 200 | GO:0051216 | cartilage development                                    | 8.01E-04 | 4.37E-02 | 5  |
| 201 | GO:0010648 | negative regulation of cell communication                | 8.27E-04 | 4.49E-02 | 14 |
| 202 | GO:0030850 | prostate gland development                               | 8.38E-04 | 4.52E-02 | 3  |
| 203 | GO:0023057 | negative regulation of signaling                         | 8.59E-04 | 4.61E-02 | 14 |
| 204 | GO:0044092 | negative regulation of molecular function                | 8.81E-04 | 4.71E-02 | 12 |
| 205 | GO:0030195 | negative regulation of blood coagulation                 | 8.93E-04 | 4.71E-02 | 3  |
| 206 | GO:0072102 | glomerulus morphogenesis                                 | 8.94E-04 | 4.71E-02 | 2  |
| 207 | GO:0043589 | skin morphogenesis                                       | 8.94E-04 | 4.71E-02 | 2  |
| 208 | GO:1901699 | cellular response to nitrogen compound                   | 9.14E-04 | 4.79E-02 | 9  |
| 209 | GO:0006935 | chemotaxis                                               | 9.30E-04 | 4.85E-02 | 8  |
| 210 | GO:1900047 | negative regulation of hemostasis                        | 9.51E-04 | 4.91E-02 | 3  |
| 211 | GO:0030282 | bone mineralization                                      | 9.51E-04 | 4.91E-02 | 3  |
| 212 | GO:0048584 | positive regulation of response to stimulus              | 9.55E-04 | 4.91E-02 | 20 |
| 213 | GO:0042330 | taxis                                                    | 9.68E-04 | 4.95E-02 | 8  |
| 214 | GO:0007548 | sex differentiation                                      | 9.76E-04 | 4.97E-02 | 6  |

**Supplemental Table 9:** GOnet/DICE GOBP enrichment of significantly upregulated genes (DEGs) in ECM1+ F-Act cells, relative to ECM1- F-act cells.

| Rank | GO_term_def                                       | P        | P_FDR_adj | NofGenes |
|------|---------------------------------------------------|----------|-----------|----------|
| 1    | extracellular structure organization              | 5.00E-10 | 5.32E-06  | 9        |
| 2    | extracellular matrix organization                 | 4.50E-09 | 2.47E-05  | 8        |
| 3    | regulation of complement activation               | 2.29E-06 | 8.33E-03  | 3        |
| 4    | regulation of response to stimulus                | 4.26E-06 | 1.16E-02  | 19       |
| 5    | cellular component organization                   | 1.90E-05 | 4.15E-02  | 21       |
| 6    | regulation of humoral immune response             | 2.86E-05 | 4.64E-02  | 3        |
| 7    | cellular component organization or biogenesis     | 3.38E-05 | 4.64E-02  | 21       |
| 8    | response to wounding                              | 3.54E-05 | 4.64E-02  | 6        |
| 9    | regulation of nitrogen compound metabolic process | 4.38E-05 | 4.64E-02  | 20       |
| 10   | myelination                                       | 4.69E-05 | 4.64E-02  | 4        |
| 11   | ensheathment of neurons                           | 5.16E-05 | 4.64E-02  | 4        |
| 12   | axon ensheathment                                 | 5.16E-05 | 4.64E-02  | 4        |
| 13   | paranodal junction assembly                       | 5.53E-05 | 4.64E-02  | 2        |
| 14   | negative regulation of blood coagulation          | 6.00E-05 | 4.65E-02  | 3        |
| 15   | negative regulation of hemostasis                 | 6.40E-05 | 4.65E-02  | 3        |
| 16   | negative regulation of coagulation                | 6.82E-05 | 4.65E-02  | 3        |
| 17   | collagen fibril organization                      | 7.26E-05 | 4.66E-02  | 3        |

**Supplemental Table 10:** GOnet/DICE GOBP enrichment of significantly upregulated genes (DEGs) in ECM1+ F-SH cells, relative to ECM1- F-SH cells.

| Rank | GO_term_def                                             | P        | P_FDR_adj | NofGenes |
|------|---------------------------------------------------------|----------|-----------|----------|
| 1    | extracellular structure organization                    | 6.00E-10 | 6.86E-06  | 8        |
| 2    | extracellular matrix organization                       | 8.80E-09 | 4.77E-05  | 7        |
| 3    | supramolecular fiber organization                       | 7.30E-07 | 2.65E-03  | 7        |
| 4    | membrane raft organization                              | 1.60E-06 | 4.36E-03  | 3        |
| 5    | negative regulation of multicellular organismal process | 1.41E-05 | 2.32E-02  | 9        |
| 6    | negative regulation of blood coagulation                | 2.09E-05 | 2.32E-02  | 3        |
| 7    | negative regulation of hemostasis                       | 2.23E-05 | 2.32E-02  | 3        |
| 8    | response to other organism                              | 2.24E-05 | 2.32E-02  | 9        |
| 9    | response to external biotic stimulus                    | 2.26E-05 | 2.32E-02  | 9        |
| 10   | negative regulation of coagulation                      | 2.38E-05 | 2.32E-02  | 3        |
| 11   | collagen fibril organization                            | 2.53E-05 | 2.32E-02  | 3        |
| 12   | response to biotic stimulus                             | 2.56E-05 | 2.32E-02  | 9        |
| 13   | regulation of body fluid levels                         | 4.44E-05 | 3.72E-02  | 5        |
| 14   | regulation of protein processing                        | 5.65E-05 | 4.22E-02  | 3        |
| 15   | negative regulation of cellular process                 | 5.86E-05 | 4.22E-02  | 15       |
| 16   | regulation of protein maturation                        | 6.20E-05 | 4.22E-02  | 3        |
| 17   | negative regulation of wound healing                    | 7.08E-05 | 4.28E-02  | 3        |
| 18   | membrane raft assembly                                  | 7.17E-05 | 4.28E-02  | 2        |
| 19   | multi-organism process                                  | 7.46E-05 | 4.28E-02  | 11       |
| 20   | regulation of blood coagulation                         | 9.83E-05 | 4.77E-02  | 3        |
| 21   | regulation of plasminogen activation                    | 1.02E-04 | 4.77E-02  | 2        |
| 22   | regulation of hemostasis                                | 1.02E-04 | 4.77E-02  | 3        |
| 23   | negative regulation of cell population proliferation    | 1.14E-04 | 4.77E-02  | 6        |
| 24   | regulation of coagulation                               | 1.14E-04 | 4.77E-02  | 3        |
| 25   | positive regulation of biological process               | 1.15E-04 | 4.77E-02  | 17       |
| 26   | negative regulation of multi-organism process           | 1.15E-04 | 4.77E-02  | 4        |
| 27   | regulation of protein metabolic process                 | 1.24E-04 | 4.77E-02  | 11       |
| 28   | vesicle organization                                    | 1.30E-04 | 4.77E-02  | 4        |
| 29   | fibrinolysis                                            | 1.36E-04 | 4.77E-02  | 2        |
| 30   | negative regulation of response to wounding             | 1.37E-04 | 4.77E-02  | 3        |
| 31   | regulation of proteolysis                               | 1.38E-04 | 4.77E-02  | 6        |
| 32   | regulation of developmental process                     | 1.40E-04 | 4.77E-02  | 11       |

**Supplemental Table 11:** GOnet/DICE GOBP enrichment of significantly upregulated genes (DEGs) in ECM1+ M1MΦ cells, relative to ECM1- M1MΦ cells.

| Rank | GO_term_def                                          | P        | P_FDR_adj | NofGenes |
|------|------------------------------------------------------|----------|-----------|----------|
| 1    | neutrophil chemotaxis                                | 1.30E-09 | 8.47E-06  | 5        |
| 2    | granulocyte chemotaxis                               | 2.10E-09 | 8.47E-06  | 5        |
| 3    | neutrophil migration                                 | 2.30E-09 | 8.47E-06  | 5        |
| 4    | granulocyte migration                                | 4.10E-09 | 1.12E-05  | 5        |
| 5    | myeloid leukocyte migration                          | 1.25E-08 | 2.72E-05  | 5        |
| 6    | leukocyte chemotaxis                                 | 2.04E-08 | 3.71E-05  | 5        |
| 7    | organonitrogen compound catabolic process            | 4.62E-08 | 7.19E-05  | 8        |
| 8    | organic substance catabolic process                  | 1.04E-07 | 1.42E-04  | 9        |
| 9    | leukocyte migration                                  | 1.74E-07 | 2.00E-04  | 5        |
| 10   | positive regulation of immune system process         | 1.96E-07 | 2.00E-04  | 8        |
| 11   | cell chemotaxis                                      | 2.02E-07 | 2.00E-04  | 5        |
| 12   | catabolic process                                    | 5.06E-07 | 4.60E-04  | 9        |
| 13   | chemotaxis                                           | 5.82E-07 | 4.70E-04  | 6        |
| 14   | taxis                                                | 6.04E-07 | 4.70E-04  | 6        |
| 15   | regulation of leukocyte chemotaxis                   | 8.85E-07 | 6.43E-04  | 4        |
| 16   | cellular catabolic process                           | 2.40E-06 | 1.55E-03  | 8        |
| 17   | positive regulation of leukocyte migration           | 2.42E-06 | 1.55E-03  | 4        |
| 18   | regulation of apoptotic process                      | 2.86E-06 | 1.67E-03  | 8        |
| 19   | regulation of immune system process                  | 2.91E-06 | 1.67E-03  | 8        |
| 20   | regulation of programmed cell death                  | 3.20E-06 | 1.67E-03  | 8        |
| 21   | regulation of epithelial cell proliferation          | 3.22E-06 | 1.67E-03  | 5        |
| 22   | regulation of mononuclear cell migration             | 5.09E-06 | 2.48E-03  | 3        |
| 23   | regulation of cell population proliferation          | 5.23E-06 | 2.48E-03  | 8        |
| 24   | negative regulation of neuron apoptotic process      | 5.99E-06 | 2.65E-03  | 4        |
| 25   | immune system process                                | 6.32E-06 | 2.65E-03  | 9        |
| 26   | regulation of cell death                             | 6.33E-06 | 2.65E-03  | 8        |
| 27   | regulation of leukocyte migration                    | 9.06E-06 | 3.66E-03  | 4        |
| 28   | inflammatory response                                | 9.89E-06 | 3.85E-03  | 5        |
| 29   | positive regulation of response to external stimulus | 1.06E-05 | 3.96E-03  | 5        |
| 30   | regulation of chemotaxis                             | 1.16E-05 | 4.22E-03  | 4        |
| 31   | regulation of cell communication                     | 1.49E-05 | 5.24E-03  | 10       |
| 32   | regulation of signaling                              | 1.55E-05 | 5.28E-03  | 10       |
| 33   | negative regulation of neuron death                  | 2.04E-05 | 6.73E-03  | 4        |
| 34   | negative regulation of apoptotic process             | 2.27E-05 | 7.19E-03  | 6        |
| 35   | positive regulation of cell migration                | 2.34E-05 | 7.19E-03  | 5        |
| 36   | regulation of response to external stimulus          | 2.37E-05 | 7.19E-03  | 6        |
| 37   | negative regulation of programmed cell death         | 2.52E-05 | 7.43E-03  | 6        |
| 38   | positive regulation of leukocyte chemotaxis          | 2.71E-05 | 7.61E-03  | 3        |
| 39   | regulation of neuron apoptotic process               | 2.76E-05 | 7.61E-03  | 4        |
| 40   | positive regulation of cell motility                 | 2.83E-05 | 7.61E-03  | 5        |
| 41   | regulation of signal transduction                    | 2.86E-05 | 7.61E-03  | 9        |

|    |                                                                        |          |          |    |
|----|------------------------------------------------------------------------|----------|----------|----|
| 42 | response to oxygen-containing compound                                 | 3.03E-05 | 7.86E-03 | 7  |
| 43 | positive regulation of cellular component movement                     | 3.32E-05 | 8.23E-03 | 5  |
| 44 | regulation of localization                                             | 3.32E-05 | 8.23E-03 | 9  |
| 45 | complement receptor mediated signaling pathway                         | 3.41E-05 | 8.27E-03 | 2  |
| 46 | positive regulation of locomotion                                      | 3.69E-05 | 8.56E-03 | 5  |
| 47 | negative regulation of cellular process                                | 3.69E-05 | 8.56E-03 | 11 |
| 48 | regulation of cellular component movement                              | 4.10E-05 | 9.31E-03 | 6  |
| 49 | negative regulation of response to stimulus                            | 4.52E-05 | 1.01E-02 | 7  |
| 50 | negative regulation of cell death                                      | 4.69E-05 | 1.02E-02 | 6  |
| 51 | regulation of angiogenesis                                             | 4.77E-05 | 1.02E-02 | 4  |
| 52 | protein catabolic process                                              | 4.85E-05 | 1.02E-02 | 5  |
| 53 | regulation of response to stimulus                                     | 6.54E-05 | 1.35E-02 | 10 |
| 54 | regulation of cytokine production                                      | 7.13E-05 | 1.42E-02 | 5  |
| 55 | regulation of vasculature development                                  | 7.17E-05 | 1.42E-02 | 4  |
| 56 | regulation of biological quality                                       | 8.61E-05 | 1.63E-02 | 10 |
| 57 | positive regulation of cellular metabolic process                      | 8.66E-05 | 1.63E-02 | 9  |
| 58 | negative regulation of signal transduction                             | 8.81E-05 | 1.63E-02 | 6  |
| 59 | locomotion                                                             | 8.85E-05 | 1.63E-02 | 6  |
| 60 | regulation of endothelial cell proliferation                           | 8.98E-05 | 1.63E-02 | 3  |
| 61 | positive regulation of macrophage chemotaxis                           | 9.16E-05 | 1.64E-02 | 2  |
| 62 | response to molecule of bacterial origin                               | 9.62E-05 | 1.69E-02 | 4  |
| 63 | regulation of multicellular organismal process                         | 9.92E-05 | 1.69E-02 | 9  |
| 64 | regulation of neuron death                                             | 9.93E-05 | 1.69E-02 | 4  |
| 65 | negative regulation of cytokine production involved in immune response | 1.10E-04 | 1.85E-02 | 2  |
| 66 | positive regulation of chemotaxis                                      | 1.12E-04 | 1.85E-02 | 3  |
| 67 | negative regulation of biological process                              | 1.21E-04 | 1.96E-02 | 11 |
| 68 | positive regulation of vascular endothelial growth factor production   | 1.31E-04 | 2.06E-02 | 2  |
| 69 | positive regulation of neutrophil chemotaxis                           | 1.31E-04 | 2.06E-02 | 2  |
| 70 | positive regulation of macrophage migration                            | 1.41E-04 | 2.20E-02 | 2  |
| 71 | negative regulation of cell communication                              | 1.49E-04 | 2.28E-02 | 6  |
| 72 | negative regulation of signaling                                       | 1.52E-04 | 2.28E-02 | 6  |
| 73 | positive regulation of granulocyte chemotaxis                          | 1.53E-04 | 2.28E-02 | 2  |
| 74 | defense response                                                       | 1.71E-04 | 2.52E-02 | 6  |
| 75 | positive regulation of metabolic process                               | 1.74E-04 | 2.52E-02 | 9  |
| 76 | negative regulation of multicellular organismal process                | 1.80E-04 | 2.58E-02 | 6  |
| 77 | macromolecule catabolic process                                        | 1.90E-04 | 2.69E-02 | 5  |
| 78 | cell migration                                                         | 1.93E-04 | 2.70E-02 | 5  |
| 79 | regulation of macrophage chemotaxis                                    | 2.02E-04 | 2.72E-02 | 2  |
| 80 | regulation of vascular endothelial growth factor production            | 2.02E-04 | 2.72E-02 | 2  |
| 81 | regulation of neutrophil chemotaxis                                    | 2.02E-04 | 2.72E-02 | 2  |
| 82 | epithelial tube branching involved in lung morphogenesis               | 2.29E-04 | 3.05E-02 | 2  |
| 83 | positive regulation of neutrophil migration                            | 2.43E-04 | 3.20E-02 | 2  |

|     |                                                                            |          |          |   |
|-----|----------------------------------------------------------------------------|----------|----------|---|
| 84  | negative regulation of immune system process                               | 2.52E-04 | 3.20E-02 | 4 |
| 85  | regulation of cell migration                                               | 2.53E-04 | 3.20E-02 | 5 |
| 86  | positive regulation of angiogenesis                                        | 2.55E-04 | 3.20E-02 | 3 |
| 87  | negative regulation of production of molecular mediator of immune response | 2.58E-04 | 3.20E-02 | 2 |
| 88  | defense response to protozoan                                              | 2.58E-04 | 3.20E-02 | 2 |
| 89  | positive regulation of epithelial cell proliferation                       | 3.16E-04 | 3.84E-02 | 3 |
| 90  | response to protozoan                                                      | 3.21E-04 | 3.84E-02 | 2 |
| 91  | regulation of cell motility                                                | 3.21E-04 | 3.84E-02 | 5 |
| 92  | response to chemical                                                       | 3.27E-04 | 3.87E-02 | 9 |
| 93  | positive regulation of vasculature development                             | 3.39E-04 | 3.98E-02 | 3 |
| 94  | regulation of macrophage migration                                         | 3.55E-04 | 4.11E-02 | 2 |
| 95  | cell motility                                                              | 3.64E-04 | 4.13E-02 | 5 |
| 96  | localization of cell                                                       | 3.64E-04 | 4.13E-02 | 5 |
| 97  | regulation of neutrophil migration                                         | 3.72E-04 | 4.18E-02 | 2 |
| 98  | positive regulation of cell population proliferation                       | 3.78E-04 | 4.21E-02 | 5 |
| 99  | cellular response to lipid                                                 | 3.83E-04 | 4.22E-02 | 4 |
| 100 | positive regulation of nitrogen compound metabolic process                 | 4.27E-04 | 4.65E-02 | 8 |
| 101 | proteolysis involved in cellular protein catabolic process                 | 4.59E-04 | 4.96E-02 | 4 |
| 102 | regulation of locomotion                                                   | 4.66E-04 | 4.98E-02 | 5 |

**Supplemental Table 12:** Full phosphoproteomics mass spectrometry output of ECM1 treated HuCFb cells, only significantly different phosphoproteins proteins shown, relative to controls treated with media alone.

| Gene names | Student's T-test p-value C_ECM | Student's T-test q-value C_ECM | Student's T-test Difference C_ECM | fold-change relative to control | Amino acid | Charge | Multiplicity | Position | Proteins | Positions within proteins |
|------------|--------------------------------|--------------------------------|-----------------------------------|---------------------------------|------------|--------|--------------|----------|----------|---------------------------|
| MAP1B      | 0.000                          | 0.000                          | -4.7712                           | 27.3076                         | S          | 3      | __2          | 1256     | P46821   | 1256                      |
| ARHGEF11   | 0.000                          | 0.016                          | -3.3661                           | 10.3107                         | S          | 3      | __2          | 255      | O15085   | 255                       |
| ANAPC4     | 0.001                          | 0.033                          | -1.9620                           | 3.8960                          | S          | 3      | __2          | 779      | Q9UJX5   | 779                       |
| ANAPC4     | 0.000                          | 0.015                          | -1.8261                           | 3.5459                          | S          | 3      | __2          | 777      | Q9UJX5   | 777                       |
| MYO9B      | 0.002                          | 0.048                          | -1.4654                           | 2.7614                          | S          | 3      | __1          | 1972     | Q13459   | 1972                      |
| CETN2      | 0.000                          | 0.028                          | -1.4351                           | 2.7041                          | S          | 3      | __1          | 20       | P41208   | 20                        |
| SURF2      | 0.001                          | 0.038                          | -1.3832                           | 2.6085                          | T          | 3      | __1          | 195      | Q15527   | 195                       |
| MAP1B      | 0.001                          | 0.045                          | -1.3695                           | 2.5839                          | S          | 3      | __3          | 1254     | P46821   | 1254                      |
| PTPN12     | 0.000                          | 0.029                          | -1.2086                           | 2.3112                          | T          | 3      | __1          | 509      | Q05209   | 509                       |
| KIFAP3     | 0.001                          | 0.049                          | -1.2039                           | 2.3036                          | S          | 2      | __1          | 60       | Q92845   | 60                        |
| MAP7D1     | 0.001                          | 0.048                          | 1.2388                            | -2.3600                         | S          | 3      | __1          | 410      | Q3KQU3   | 410                       |
| BICC1      | 0.001                          | 0.051                          | 1.3199                            | -2.4965                         | S          | 2      | __2          | 637      | Q9H694   | 637                       |
| KRI1       | 0.001                          | 0.038                          | 1.3394                            | -2.5304                         | S          | 2      | __1          | 136      | Q8N9T8   | 136                       |
| SSH3       | 0.001                          | 0.039                          | 1.3583                            | -2.5638                         | S          | 2      | __1          | 649      | Q8TE77   | 649                       |
| PSMF1      | 0.001                          | 0.038                          | 1.3659                            | -2.5775                         | S          | 2      | __1          | 153      | Q92530   | 153                       |
| TNKS1BP1   | 0.002                          | 0.053                          | 1.3756                            | -2.5948                         | S          | 2      | __1          | 1533     | Q9C0C2   | 1533                      |
| BAG6       | 0.000                          | 0.033                          | 1.3962                            | -2.6321                         | S          | 2      | __1          | 1117     | P46379   | 1117                      |
| CNOT2      | 0.000                          | 0.032                          | 1.4042                            | -2.6467                         | S          | 2      | __1          | 165      | Q9NZN8   | 165                       |
| THRAP3     | 0.002                          | 0.051                          | 1.5059                            | -2.8400                         | S          | 2      | __1          | 248      | Q9Y2W1   | 248                       |
| GBF1       | 0.001                          | 0.036                          | 1.5352                            | -2.8982                         | S          | 2      | __1          | 1780     | Q92538   | 1780                      |
| SLC38A1    | 0.001                          | 0.041                          | 1.5698                            | -2.9687                         | S          | 2      | __1          | 49       | Q9H2H9   | 49                        |
| LIG3       | 0.001                          | 0.036                          | 1.6024                            | -3.0366                         | S          | 2      | __1          | 242      | P49916   | 242                       |
| RBM8A      | 0.002                          | 0.045                          | 1.6026                            | -3.0369                         | S          | 2      | __1          | 42       | Q9Y5S9   | 42                        |
| TBX3       | 0.000                          | 0.031                          | 1.6360                            | -3.1079                         | S          | 2      | __1          | 438      | O15119   | 438                       |



|                   |       |       |        |          |   |   |      |     |                      |             |
|-------------------|-------|-------|--------|----------|---|---|------|-----|----------------------|-------------|
| SRRM2             | 0.002 | 0.046 | 1.6526 | -3.1440  | T | 2 | ___3 | 903 | Q9UQ35               | 903         |
| VIM;GFAP          | 0.001 | 0.034 | 1.7873 | -3.4518  | S | 2 | ___1 | 339 | P08670;P14136        | 339;305     |
| PRPF38B           | 0.003 | 0.050 | 1.8236 | -3.5397  | S | 3 | ___1 | 529 | Q5VTL8               | 529         |
| ARHGEF12          | 0.001 | 0.028 | 2.0181 | -4.0504  | S | 3 | ___1 | 309 | Q9NZN5               | 309         |
| SRRM1             | 0.001 | 0.033 | 2.0541 | -4.1527  | S | 2 | ___1 | 414 | Q8IYB3               | 414         |
| HECTD1            | 0.004 | 0.049 | 2.1957 | -4.5810  | S | 2 | ___1 | 357 | Q9ULT8               | 357         |
| RNPS1             | 0.004 | 0.046 | 2.2128 | -4.6359  | S | 2 | ___2 | 139 | Q15287               | 139         |
| RNPS1             | 0.004 | 0.045 | 2.2128 | -4.6359  | S | 2 | ___2 | 141 | Q15287               | 141         |
| LEMD2             | 0.000 | 0.002 | 2.5741 | -5.9549  | S | 3 | ___2 | 134 | Q8NC56               | 134         |
| DNAJC17           | 0.002 | 0.040 | 2.7030 | -6.5116  | S | 2 | ___1 | 112 | Q9NVM6               | 112         |
| TRA2B;TRA2A;SRRM1 | 0.000 | 0.012 | 3.2306 | -9.3864  | S | 2 | ___3 | 308 | P62995;Q13595;Q8IYB3 | 282;276;308 |
| TRA2B;TRA2A;SRRM1 | 0.000 | 0.011 | 3.4516 | -10.9404 | S | 2 | ___3 | 310 | P62995;Q13595;Q8IYB3 | 284;278;310 |
| SRSF1             | 0.000 | 0.008 | 3.4745 | -11.1155 | S | 2 | ___3 | 225 | Q07955               | 225         |
| SRSF1             | 0.000 | 0.006 | 3.4795 | -11.1543 | S | 2 | ___3 | 227 | Q07955               | 227         |

**Supplemental Table 13:** Fisher's exact test (Perseus software) of GO terms significantly enriched in ECM1 treated HuCFb samples (from phosphoproteomics data) ranked by p-value.

| <b>GO Category</b> | <b>GOBP term</b>                                                  | <b>Enrichment factor</b> | <b>P value</b> | <b>Benj. Hoch. FDR</b> |
|--------------------|-------------------------------------------------------------------|--------------------------|----------------|------------------------|
| GOBP name          | regulation of calcium-dependent cell-cell adhesion                | 234.38                   | 0.004          | 0.996                  |
| GOBP name          | positive regulation of calcium-dependent cell-cell adhesion       | 234.38                   | 0.004          | 0.996                  |
| GOBP name          | monocyte chemotaxis                                               | 234.38                   | 0.004          | 0.996                  |
| GOBP name          | macrophage chemotaxis                                             | 234.38                   | 0.004          | 0.996                  |
| GOBP name          | centriole replication                                             | 117.19                   | 0.009          | 0.996                  |
| GOBP name          | mitochondrion transport along microtubule                         | 78.125                   | 0.013          | 0.996                  |
| GOBP name          | lamellipodium morphogenesis                                       | 78.125                   | 0.013          | 0.996                  |
| GOBP name          | establishment or maintenance of monopolar cell polarity           | 78.125                   | 0.013          | 0.996                  |
| GOBP name          | establishment of monopolar cell polarity                          | 78.125                   | 0.013          | 0.996                  |
| GOBP name          | establishment of mitochondrion localization, microtubule-mediated | 78.125                   | 0.013          | 0.996                  |
| GOBP name          | plus-end-directed vesicle transport along microtubule             | 58.594                   | 0.017          | 0.996                  |
| GOBP name          | plus-end-directed organelle transport along microtubule           | 58.594                   | 0.017          | 0.996                  |
| GOBP name          | establishment of mitochondrion localization                       | 58.594                   | 0.017          | 0.996                  |
| GOBP name          | establishment of cell polarity                                    | 39.062                   | 0.000          | 0.239                  |
| GOBP name          | organelle transport along microtubule                             | 39.062                   | 0.001          | 0.996                  |
| GOBP name          | Rho protein signal transduction                                   | 23.438                   | 0.003          | 0.996                  |
| GOBP name          | microtubule-based transport                                       | 20.38                    | 0.004          | 0.996                  |
| GOBP name          | establishment or maintenance of cell polarity                     | 19.003                   | 0.000          | 0.996                  |
| GOBP name          | cytoskeleton-dependent intracellular transport                    | 18.75                    | 0.004          | 0.996                  |
| GOBP name          | microtubule-based movement                                        | 14.205                   | 0.008          | 0.996                  |
| GOBP name          | Ras protein signal transduction                                   | 9.9734                   | 0.015          | 0.996                  |
| GOBP name          | regulation of cell growth                                         | 9.0144                   | 0.018          | 0.996                  |
| GOBP name          | nuclear division                                                  | 8.8443                   | 0.019          | 0.996                  |
| GOBP name          | mitosis                                                           | 8.8443                   | 0.019          | 0.996                  |
| GOBP name          | microtubule-based process                                         | 7.9003                   | 0.005          | 0.996                  |
| GOBP name          | cellular component movement                                       | 6.0484                   | 0.002          | 0.996                  |
| GOBP name          | cellular component organization at cellular level                 | 2.1769                   | 0.020          | 0.996                  |
|                    |                                                                   |                          |                |                        |

| <b>GO Category</b> | <b>GOCC term</b>                                            | <b>Enrichment factor</b> | <b>P value</b> | <b>Benj. Hoch. FDR</b> |
|--------------------|-------------------------------------------------------------|--------------------------|----------------|------------------------|
| GOCC name          | photoreceptor connecting cilium                             | 156.25                   | 4.766E-05      | 0.039                  |
| GOCC name          | nonmotile primary cilium                                    | 66.964                   | 3.294E-04      | 0.136                  |
| GOCC name          | cell projection                                             | 5.5804                   | 6.674E-04      | 0.183                  |
| GOCC name          | cytosol                                                     | 3.0159                   | 9.597E-04      | 0.198                  |
| GOCC name          | primary cilium                                              | 33.482                   | 0.001          | 0.221                  |
| GOCC name          | cytoskeletal part                                           | 4.6137                   | 0.002          | 0.221                  |
| GOCC name          | cilium                                                      | 21.307                   | 0.003          | 0.391                  |
| GOCC name          | intraflagellar transport particle                           | 234.38                   | 0.004          | 0.391                  |
| GOCC name          | filopodium tip                                              | 234.38                   | 0.004          | 0.391                  |
| GOCC name          | microtubule associated complex                              | 15.121                   | 0.007          | 0.527                  |
| GOCC name          | intracellular                                               | 13.787                   | 0.008          | 0.527                  |
| GOCC name          | kinesin II complex                                          | 117.19                   | 0.009          | 0.527                  |
| GOCC name          | cell projection part                                        | 6.2223                   | 0.009          | 0.527                  |
| GOCC name          | protein complex                                             | 2.5476                   | 0.009          | 0.527                  |
| GOCC name          | XPC complex                                                 | 78.125                   | 0.013          | 0.582                  |
| GOCC name          | nucleotide-excision repair complex                          | 78.125                   | 0.013          | 0.582                  |
| GOCC name          | nuclear ubiquitin ligase complex                            | 78.125                   | 0.013          | 0.582                  |
| GOCC name          | anaphase-promoting complex                                  | 78.125                   | 0.013          | 0.582                  |
| GOCC name          | axoneme part                                                | 58.594                   | 0.017          | 0.695                  |
| GOCC name          | axoneme                                                     | 58.594                   | 0.017          | 0.695                  |
|                    |                                                             |                          |                |                        |
| <b>GO Category</b> | <b>GOMF term</b>                                            | <b>Enrichment factor</b> | <b>P value</b> | <b>Benj. Hoch. FDR</b> |
| GOMF name          | non-membrane spanning protein tyrosine phosphatase activity | 234.38                   | 0.004          | 0.996                  |
| GOMF name          | microfilament motor activity                                | 78.125                   | 0.013          | 0.996                  |
| GOMF name          | actin-dependent ATPase activity                             | 58.594                   | 0.017          | 0.996                  |

**Supplemental Table 14:** ECM1 binding partners were pulled out from a purified HuCFb membrane protein lysate using ECM1 coated His-tag isolation Dynabeads and subject to mass spectrometry. Presented is a list of proteins significantly enriched in ECM1 coated pull-down beads, relative to control beads, ranked by p-value. Two proteins of interest (LRP1 and CTNND1) are bolded in green text.

| Rank | Gene names    | p-value   | fold enriched vs Control |
|------|---------------|-----------|--------------------------|
| 1    | ECM1          | 5.218E-05 | 197.246                  |
| 2    | ACSL3         | 3.715E-04 | 4.078                    |
| 3    | PKM           | 0.001     | 1.203                    |
| 4    | SFXN1         | 0.001     | 2.240                    |
| 5    | UBR5          | 0.002     | 1.226                    |
| 6    | PLOD2         | 0.002     | 1.372                    |
| 7    | LAMB1         | 0.004     | 1.340                    |
| 8    | PTPN1         | 0.004     | 1.287                    |
| 9    | UQCRC1        | 0.006     | 1.984                    |
| 10   | SF3B3         | 0.008     | 1.692                    |
| 11   | HSPA9         | 0.009     | 1.559                    |
| 12   | MYH10         | 0.011     | 1.102                    |
| 13   | HNRNPK        | 0.011     | 1.848                    |
| 14   | PDHA1         | 0.012     | 1.883                    |
| 15   | <b>CTNND1</b> | 0.012     | 1.333                    |
| 16   | HNRNPH1       | 0.014     | 1.494                    |
| 17   | RPS9          | 0.014     | 5.453                    |
| 18   | SEC31A        | 0.015     | 1.277                    |
| 19   | LAMC1         | 0.016     | 1.196                    |
| 20   | RPS18         | 0.017     | 6.266                    |
| 21   | IDH2          | 0.019     | 1.134                    |
| 22   | DYNC1I2       | 0.019     | 1.494                    |
| 23   | H6PD          | 0.019     | 1.232                    |
| 24   | EPB41L2       | 0.019     | 1.186                    |
| 25   | ERLEC1        | 0.020     | 1.803                    |
| 26   | FAT4          | 0.021     | 1.208                    |
| 27   | <b>LRP1</b>   | 0.022     | 1.271                    |
| 28   | DHX9          | 0.022     | 1.465                    |
| 29   | GLG1          | 0.023     | 1.376                    |
| 30   | SAFB          | 0.024     | 2.710                    |
| 31   | HK1           | 0.024     | 1.281                    |
| 32   | NID2          | 0.025     | 1.759                    |
| 33   | GNB2L1        | 0.028     | 1.250                    |
| 34   | ESYT1         | 0.029     | 1.230                    |
| 35   | RPL23         | 0.029     | 1.324                    |
| 36   | GOLGB1        | 0.029     | 1.632                    |
| 37   | FN1           | 0.031     | 1.126                    |
| 38   | EFTUD2        | 0.031     | 1.814                    |

|    |                               |       |       |
|----|-------------------------------|-------|-------|
| 39 | PSMD12                        | 0.031 | 2.546 |
| 40 | PML                           | 0.037 | 1.206 |
| 41 | PSMC6                         | 0.037 | 1.270 |
| 42 | SF3B2                         | 0.038 | 1.211 |
| 43 | HNRNPA0                       | 0.039 | 1.234 |
| 44 | IGF2R                         | 0.039 | 1.345 |
| 45 | LTBP2                         | 0.040 | 1.444 |
| 46 | DDX5                          | 0.040 | 1.894 |
| 47 | NUP205                        | 0.040 | 1.114 |
| 48 | HLA-B;HLA-C;HLA-H;HLA-E;HLA-A | 0.043 | 1.282 |
| 49 | GYS1                          | 0.043 | 1.722 |
| 50 | CCAR2                         | 0.045 | 1.136 |
| 51 | VCAN                          | 0.046 | 1.288 |
| 52 | FAM134C                       | 0.046 | 1.180 |
| 53 | PCBP1;PCBP3                   | 0.047 | 1.859 |
| 54 | STOM                          | 0.047 | 1.187 |
| 55 | SRRM2                         | 0.047 | 1.430 |
| 56 | GCN1L1                        | 0.048 | 1.097 |
| 57 | RAB7A                         | 0.048 | 1.718 |
| 58 | PLXDC2                        | 0.049 | 1.245 |

## Supplemental Methods

### Reanalysis of published mouse single-cell RNA-sequencing data post-MI

scRNAseq data (ArrayExpress [www.ebi.ac.uk/arrayexpress](http://www.ebi.ac.uk/arrayexpress), accession codes E-MTAB-7376) were reanalysed using the Seurat R package 26, with UMAP dimensionality reduction calculated on the top 25 principal components. Cell labels were assigned using previous characterizations (Farbehi et al., 2019). Differentially expressed genes were calculated using the Seurat Find Markers program with MAST testing 27, with a gene defined as DE if it obtained a Bonferroni-adjusted p-value  $< 1 \times 10^{-5}$  and an absolute log fold-change difference  $> 0.25$ . For gene expression correlation analyses with *Ecm1*, Spearman correlation was calculated using the R `cor.test` function on log-normalized counts. For comparison of *Ecm1* expression with ligand-receptor connections, we used a previous approach for modelling ligand-receptor communication between cell populations in Scrase data (Farbehi et al., 2019). Briefly, using a curated set of ligand-receptor pairs 28, a communication weight between a source (ligand-expressing) and target (receptor-expressing) cell type is calculated according to the fold-change difference of the ligand and receptor expression for the source and target cell populations, respectively, with reference to protein: protein association scores in the STRING database 29. *Ecm1* expression was correlated (Spearman's Rho) with the number of outbound high-weighted paths (weight  $> 1.5$ ) for each cell type.

### Protein extraction and quantification

To isolate total protein for use in SDS-PAGE, samples were suspended in RIPA lysis buffer containing Roche complete, Mini, EDTA-free protease inhibitor and Phos STOP phosphatase inhibitor cocktail (Sigma-Aldrich®) and homogenized using a Precellys®24 high-throughput tissue homogenizer as per the manufacturer's protocol. The concentration of protein lysate was quantified via BCA assay using a Pierce BCA Protein Assay Kit (ThermoFisher Scientific) as per the manufacturer's protocol.

### RNA isolation and analysis

Cells were treated with ECM1 (20ng/ml) in starving media or were untreated control cells (starving media alone) for either 3 h, 6 h or 16 h; as per the Cell culture procedures in main document. Cells were harvested/collected in 900µl Trizol (LS Reagent, Ambion) and disrupted with mechanical forces. RNA was extracted with Trizol (LS Reagent, Ambion) and purified using RNeasy Mini Kits from Qiagen, including gDNA elimination steps as per the manufacturer's protocol. One µg of RNA was used for the synthesis of cDNA utilizing QuantiTect Reverse Transcription kits (Qiagen) and qPCR was performed with Advanced Universal SYBR Green Supermix (BIO RAD). The following primers were used:

**Table SM1: Primers and their sequences used for HuCFb cell qPCR experiments**

| target | FW primer                   | REV primer                  |
|--------|-----------------------------|-----------------------------|
| Tpt1   | GGC ATG GTT GCT CTA TTG GA  | ATT TCC CCT CCA CGG CTC AA  |
| Tgfb1  | ATT CCT GGC GAT ACC TCA GC  | ATT TCC CCT CCA CGG CTC AA  |
| Tgfb2  | GAG AGG AGC GAC GAA GAG TA  | TGA GCC AGA GGG TGT TGT     |
| CXCL1  | CAC CCC AAG AAC ATC CAA AG  | CTT AAC TAT GGG GGA TGC AGG |
| Wnt5a  | CTT TGG GGA TGG CTG GAA G   | GGG TTA TTC ATA CCT AGC GAC |
| ACTA2  | AGC GTG GCT ATT CCT TCG TT  | CCC ATC AGG CAA CTC GTA ACT |
| IL6    | TTC GGT CCA GTT GCC TTC TC  | GTG AGT GGC TGT CTG TGT GG  |
| Col1a  | TCA GAA CAT CAC CTA CCA CTG | CCC CAT TCA TTT GTC TTT TTA |
| IL1b   | GAT AAG CCC ACT CTA CAG CTG | GGC AGA CTC AAA TTC CAG CTT |
| CCL2   | AGC AGC AAG TGT CCC AAA GA  | GTG GAG TGA GTG TTC AAG TC  |
| TRAF2  | GCT GAC TTG GAG CAG AAG GT  | GGA GAA GAT GGC GGG TAT G   |

Assays were validated by generating standard curves to evaluate the efficiency of each primer set. The specificity of PCR products was analyzed via melt curve and gel electrophoresis. All target and reference genes from cDNA transcripts were measured using quantitative real-time polymerase chain reaction (qPCR), performed on a BIO RAD CFX384 and results were analyzed using the CFX Manager Software. mRNA quantities were normalized using two housekeeping genes Tpt1 and  $\beta$ -actin, and final values calculated using the  $\Delta\Delta C_t$  method.

### SDS-PAGE and immunoblot

SDS-PAGE was performed under reducing conditions. BioRad 4x XT sample buffer (BioRad) and 20x sample reducing agent (Life Technologies) was added to total protein lysate solutions, to a total volume of 30  $\mu$ L. Samples were then reduced at 90 °C for 10 min and loaded into each well of Precast Bolt 4-12% Bis-Tris Plus Gels (ThermoFisher Scientific). Gels were then placed in a Mini-Gel Tank (Life Technologies) electrophoresis system containing Bolt MES SDS Running Buffer (Life Technologies), and 150V (constant volt) was applied for ~1 h at room temperature (RT), or until the blue sample buffer had sufficiently run out of the gel casing. Gels were then transferred to nitrocellulose membranes. Membranes were blocked with 5% skim milk powder suitable for microbiology (Sigma-Aldrich) in TBS supplemented with 0.01% tween-20 (w/v) (TBS-T) for 1 h at RT. Membranes were then washed once with TBS-T and incubated for 2h at RT or overnight at 4°C with primary antibody (Table S2) in 0.5% skim milk in TBS-T. Membranes were washed 3 times in TBS-T then incubated with HRP-conjugated ECL-Anti mouse IgG and ECL-Anti Rabbit IgG (GE Healthcare; 1:5000 dilution) secondary antibodies in 0.5% skim milk in TBS-T for 1 h at RT. Membranes were washed twice with TBS-T, once with TBS, incubated with either Clarity Western ECL Substrate (BioRad), Super Signal West Pico PLUS Chemiluminescent Substrate (ThermoFisher Scientific), or Super Signal West Femto Maximum Sensitivity Substrate (ThermoFisher Scientific) and then imaged using a ChemiDoc Touch Imaging System (BioRad). Immunoblots were analyzed using Image Studio software (Lite version 5.2) to return a numerical value based on band density/intensity, to be used for quantification of protein expression. All washing and incubation steps above were performed on agitation.

**Table SM2: Antibodies used.**

| Antibody Name                                                                           | Cat#       | Company                   | Concentration                                 |
|-----------------------------------------------------------------------------------------|------------|---------------------------|-----------------------------------------------|
| ECM1 for Immunohistochemistry (IHC) and immunofluorescence/immunocytochemistry (IF/ICC) | ab126629   | Abcam                     | 1:100                                         |
| ECM1 for immunoblotting                                                                 | HPA027241  | Sigma-Aldrich             | 1:500                                         |
| LRP1                                                                                    | 37-7600    | Invitrogen                | 1:200                                         |
| Vimentin                                                                                | Ab45939    | Abcam                     | 1:1000                                        |
| Alpha-smooth muscle actin                                                               | 14-9760-82 | Invitrogen                | 1:500                                         |
| CTNND1 for immunoblotting and IF/ICC                                                    | 33-9600    | ThermoFisher              | 1:1500<br>(immunoblotting),<br>1:200 (IF/ICC) |
| Phospho-CTNND1 (s268)                                                                   | PA5-77935  | ThermoFisher              | 1:1500                                        |
| Phospho-CTNND1 (s252)                                                                   | 8477       | Cell signaling technology | 1:500                                         |
| b-catenin                                                                               | 13-8400    | ThermoFisher              | 1:1000                                        |
| Active b-catenin                                                                        | 05-665     | Sigma Aldrich             | 1:500                                         |
| Total-MYPT                                                                              | PA5-17164  | ThermoFisher              | 1:1000                                        |
| Phospho-MYPT (Thr696)                                                                   | 5163       | Cell signaling technology | 1:500                                         |
| JNK1+JNK2+JNK3                                                                          | ab179461   | Abcam                     | 1:1000                                        |
| Phospho-JNK1+JNK2+JNK3 (phospho Y185 + Y185 + Y223)                                     | ab76572    | Abcam                     | 1:1000                                        |
| IκB alpha                                                                               | MA5-15132  | ThermoFisher              | 1:500                                         |
| NF-κB p65                                                                               | 8242S      | Cell signaling technology | 1:2000                                        |
| Phospho-NF-κB p65 (Ser468)                                                              | 3039S      | Cell signaling technology | 1:500                                         |

### Immunofluorescence/Immunocytochemistry

Immunofluorescence/Immunocytochemistry (IF/ICC) was performed on HuCFb cells cultured in Corning® 96 Well Black Polystyrene Microplates (cat# CSL3603). HuCFb cells were cultured under standard conditions until 70% confluent. Media was then removed, cells washed twice with PBS, and fixed in 10% formalin for 15 minutes at room temperature. Cells were washed 3 times in PBS and stored in PBS until IF/ICC protocols commenced.

For IF/ICC, PBS was removed and cell membranes permeabilized with 2% triton x-100 in PBS for 10 minutes at room temperature. Cells were washed 3 times in PBS supplemented with 0.01% Tween-20 (PBS-T), then blocked with Intercept® (PBS) Blocking Buffer (Li-cor; cat# 927-70001) for 1 hour at room temperature. Cells were washed 3 times in PBS-T then incubated with appropriate primary antibodies diluted in Intercept® (PBS) Blocking Buffer supplemented with 0.01% Tween-20, for 1 hour at room temperature. Cells were washed 3 times with PBS-T then incubated with appropriate fluorescent secondary antibodies diluted in Intercept® (PBS) Blocking Buffer supplemented with 0.01% Tween-20, for 45 minutes at room temperature protected from light. Cells were washed 3 times in PBS-T, then incubated with DAPI nuclear stain in PBS-T for 5 minutes. Cells were washed 3 times in PBS-T followed by 2 washes in PBS and imaged with a Cytation3 (BioTek).

To determine the extent of fibroblast-myofibroblast transition, HuCFb cells were cultured to 70% confluence in Corning® 96 Well Black Polystyrene Microplates (cat# CSL3603), cells were incubated with starving media for 16 h, media aspirated, and replaced with starving media containing recombinant human ECM1 (20ng/ml), starving media with no



recombinant human ECM1 (control), or starving media containing both ECM1 (20ng/ml) and recombinant human LRPAP1 protein (RAP, Abcam cat# ab93010) at a 1000x molar excess of recombinant human ECM1, and incubated for 48 hours. LRPAP1 (RAP) is a well-known potent LRP1 cell surface receptor inhibitor.<sup>4,5</sup> Media was then removed, cells washed twice with PBS, and fixed in 10% formalin for 15 minutes at room temperature. Cells were washed 3 times in PBS and stored in PBS until IF/ICC protocols commenced, as detailed above. Fluorescence area of alpha-smooth muscle actin was quantified and normalized to the number of vimentin positive HuCFb cells. Since all cells assayed were vimentin positive, data was presented as sum area of alpha-smooth muscle actin fluorescence/total cell count (DAPI positive nuclei), analyzed with Cytation3 (BioTek) Gen5 software.

### **Immunohistochemistry (IHC) in human heart failure tissues**

Formalin-fixed paraffin-embedded (FFPE) tissue sections to be used in IHC were cut between 2-4µm, mounted onto microscopy slides, and allowed to dry overnight at 37°C.

RNAscope<sup>®</sup> was conducted according to the RNAscope 2,5 HD Detection Kit (Red) manual, with/without the “Target Retrieval solution” for 15 min (n=2 no retrieval, n=1 retrieval; n=3 total).

For IHC, tissue sections were de-waxed in xylene (2x 10 min), followed by incubation in absolute alcohol for 5 min. Tissue was then rehydrated in a series of 90, 80, 70 and 50% alcohol, followed by one wash in phosphate buffered saline (PBS, pH 7.3) for 5 min. Antigen was unmasked/retrieved by treating with 0.1% Sodium-Citrate-Puffer (pH 6.0) for 40 min at 150 watt in a microwave. Tissue sections were cooled in the antigen retrieval solution for 20 min at RT. Tissue sections were then washed well in 2 changes of distilled water (5 min each) and transferred to PBS. Endogenous peroxidase staining was blocked using 3% H<sub>2</sub>O<sub>2</sub> in methanol for 15 min at RT. Sections were washed 3 times in PBS for 3 min each. Antibody was then applied to tissue sections in 1:50 in Dako antibody diluent (cat# S2022) and incubated for 60 min at RT. Tissue sections were washed 3 times in PBS for 3 min each. UltraVision Large Volume Detection Kit was then applied to tissue (Thermo Scientific TL-125-HL) and incubated for 30 min at RT. Sections were then washed 3 times in PBS for 3 min each. Staining was visualized by applying AEC Substrate Chromogen (Ready to use, Dako cat# K3464) and incubated for 10 min at RT. Sections were washed 3 times in PBS for 3 min each and nuclei were counterstained with Mayer’s hematoxylin for 30 sec. Slides were washed in 2 changes of in tap water at 3 min each, and slides mounted with coverslips in Aquatex (Merck cat# 1.08562.0050).

### **Phospho-proteomics**

Cells were lysed in lysis buffer (6M guanidine hydrochloride, 10 mM Tris(2-carboxyethyl)phosphine hydrochloride, 40 mM 2-chloroacetamide in 100 mM Tris-HCl pH 8.5) using a sonication probe at 90% amplitude (counting to 1500 J), reduced, and alkylated for 10 min at 95 °C and centrifuged for 30 min at 3500xg and 4 °C to remove cell debris. Protein was precipitated with acetone, resuspended in 4% sodium deoxycholate (w/vol) in 100mM Tris-HCl (pH=8.5) and estimated using the Pierce<sup>™</sup> BCA Protein Assay. One mg protein was digested with Promega modified trypsin, followed by phosphopeptide enrichment according to Humphrey et al<sup>6</sup> using Venator Sachtopore NP TiO<sub>2</sub> beads (SNX

010S003, 3  $\mu\text{m}$  - 100 $\text{\AA}$ , #11110007). Half of each sample was measured in duplicate by nano-HPLC (Dionex Ultimate 3000) equipped with an Aurora Series Emitter nanocolumn with CSI fitting (C18, 1.6  $\mu\text{m}$ , 120  $\text{\AA}$ , 250 x 0.075 mm; IonOpticks, Melbourne, Australia). Separation was carried out at 50  $^{\circ}\text{C}$  at a flow rate of 300 nL/min using the following gradient, where solvent A was 0.1 % formic acid in water and solvent B was acetonitrile containing 0.1 % formic acid: 0-18 min: 2% B; 18-160 min: 2-25% B; 160-167 min: 25-35% B, 167-168 min: 35-95% B; 168-178 min: 95% B, 178-178 min: 95-2% B; 178-193 min: 2% B. Peptides were detected on a Thermo Orbitrap velos pro mass spectrometer operated in positive ion mode by alternating full scan MS ( $m/z$  300 to 2,000, 60,000 resolution) and MS/MS by HCD of the 10 most intense peaks in the ICR cell with dynamic exclusion enabled. The MS/MS data were analysed for protein identification and label free quantification using MaxQuant 1.6.2.10 against the public database Swissprot with taxonomy *Homo sapiens* and common contaminants (downloaded on 16.04.2019, 20,482 sequences). Carbamidomethylation on Cys was entered as fixed modification, oxidation on Met and phosphorylation on Ser/Thr as variable modifications. Detailed search criteria were used as follows: trypsin, max. missed cleavage sites: 2; search mode: MS/MS ion search with decoy database search included; precursor mass tolerance +/- 4.5 ppm; product mass tolerance +/- 20 ppm; acceptance parameters for identification: 1 % PSM FDR; 1% protein FDR and 1% site decoy fraction. In addition, label free quantitation including the match between runs feature of MaxQuant was performed,<sup>7</sup> requiring a minimum of 2 ratio counts of quantified razor and unique peptides. Data processing was performed using Perseus software version 1.6.5.0, following the proposed workflow for label-free phosphoproteomic data<sup>8</sup>; [http://www.coxdocs.org/doku.php?id=perseus:user:use\\_cases:modifications](http://www.coxdocs.org/doku.php?id=perseus:user:use_cases:modifications) (last accessed 30/08/2021). Contaminants and reverse phosphorylation sites created during database searches were removed. Intensities were log<sub>2</sub> transformed to lower the effect of the outlier values, filtered for a localization probability of >75% and 6 valid values in at least one group, respectively. Missing intensities were replaced with random values taken from the Gaussian distribution of values using default parameters (width of 0.3 and downshift of 1.8), to simulate an intensity value for those low abundant phosphosites. Two-sample t-test with subsequent multiple testing correction by Permutation-based FDR method were used to identify altered phosphorylation sites ( $s_0 = 0.1$ , FDR = 0.05 with reported q-value and 250 randomizations). For the calculation of signalling scores of averaged group ratios, PHOTON<sup>9</sup> implemented in Perseus version 1.6.5.0 was used, on our ECM1 treated HuCFb phosphoproteomics data as a ratio of ECM1/control with a two-sided PHOTON test, following tutorial data on GitHub (<https://github.com/jdrudolph/photon>). Protein network data for *Homo sapiens* (v11.0) was downloaded from string database.<sup>10</sup> For all additional gene ontology (GO) enrichment analysis, the GOnet/DICE online tool was used (GOBP, GOCC or GOMF; q-value threshold  $\leq 0.05$ ), developed and described by Pomaznoy et al.<sup>11</sup>

### Gene ontology testing

For all additional gene ontology (GO) enrichment analysis, "GOnet"/"DICE" online tool was used (GOBP, GOCC or GOMF; q-value threshold  $\leq 0.05$ ), developed and described by Pomaznoy et al.<sup>11</sup>

### **His-tag dependent pull-down of ECM1 protein-protein binding partners**

A purified HuCFb membrane/membrane-associated protein lysate was prepared using a Mem-PER Plus Membrane Protein Extraction Kit (ThermoFisher, cat# 89842), as per the manufacturer's protocol. Twenty ug of purified membrane/membrane-associated HuCFb lysate were used per sample. One set of membrane/membrane-associated HuCFb lysate samples (20 ug) were made up to a total volume of 200  $\mu$ l with either Mem-PER Plus Membrane Protein Extraction Kit solubilization buffer at the supplied concentration (1x detergent samples). A second set of membrane/membrane associated HuCFb lysate samples (20 ug) were made up to 200  $\mu$ l with a mixture of solubilization buffer and salt buffer to achieve a 1 in 4 diluted detergent concentration (1/4x detergent samples); the salt buffer formulation was 300 mM NaCl, 50 mM Na<sub>3</sub>PO<sub>4</sub>, pH 7.4. One mg (25  $\mu$ l) of Dynabeads His-Tag Isolation and Pulldown (ThermoFisher, cat# 10103D) were used per sample and prepared by first washing beads once with His-IP lysis buffer (50 mM Na<sub>3</sub>PO<sub>4</sub>, 300 mM NaCl, 0.01% Tween-20, 1% Triton x-100, 1x protease inhibitor [Roche, ref# COEDTAF-RO], pH 8) by pipetting beads up and down in solution, followed by placing tubes on a magnetic rack for 1 min to pellet Dynabeads and allow aspiration of wash supernatant. All following bead wash steps were conducted in this manner; similar to the Dynabeads His-Tag Isolation and Pulldown manufacturer's protocol. Washed Dynabeads were then incubation with His-IP lysis buffer containing 500 ng recombinant human ECM1 protein (ECM1 samples; R&D Systems, # 3937-EC-050), or buffer without recombinant ECM1 protein (control/CT samples) for 10 min at RT on constant rotation/inversion. ECM1 and control (no protein) bound beads were then washed 3 times with His-IP wash buffer (50 mM Na<sub>3</sub>PO<sub>4</sub>, 300 mM NaCl, 0.01% Tween-20, 1x protease inhibitor [Roche, ref# COEDTAF-RO], pH 8) and then incubated with either our previously prepared 1x detergent samples or our 1/4x detergent samples of purified membrane/membrane-associated HuCFb protein lysate, for 45 min at RT on constant rotation/inversion. After 45 min, protein-protein interactions were covalently crosslinked by adding 2.88  $\mu$ l of a 12.5 mM BS3 (ThermoFisher, cat# 21580) solution (in milli-q H<sub>2</sub>O) to the bead-HuCFb lysate sample solution (a ~20x molar excess of BS3, relative to HuCFb protein, was used). The resulting BS3-bead-HuCFb sample solutions were allowed to incubate for 30 min at RT on constant rotation/inversion to achieve protein-protein crosslinking. BS3 crosslinking reactions were then quenched by addition of 8.2  $\mu$ l of 0.5 M Tris (in milli-q H<sub>2</sub>O, pH 7.5) to achieve a final concentration of 20 mM and were incubated for 15 min at RT on constant rotation/inversion. Beads were then washed 3 times in His-IP wash buffer. The resulting purified crosslinked protein-protein complexes were then eluted from Dynabeads by resuspending beads in 30  $\mu$ l of electrophoresis sample buffer containing BioRad XT sample buffer (BioRad) and XT sample reducing agent (Life Technologies), followed by reducing at 90 °C for 10 min. Eluted samples in reduced buffer were then aspirated off Dynabeads and directly loaded into Precast Bolt 4-12% Bis-Tris Plus Gels (ThermoFisher Scientific), in a Mini Gel Tank (Life Technologies) electrophoresis system containing Bolt MES SDS Running Buffer (Life Technologies). 150 V (constant volt) was applied until the blue Coomassie dye front had migrated sufficiently into the tip 1-2cm of the gel. Gel bands containing gel filtered BS3 crosslinked protein-protein binding complexes were then carefully cut out (below the foot of the loading well but above the Coomassie dye front) and stored in 20% ethanol in milli-q H<sub>2</sub>O (w/v) at -20 until in-gel digestion for proteomics.

### **In-gel proteomics digestion and mass spectrometry of samples from His-tag dependent pull-down of ECM1 protein-protein binding partners**

Gel bands from the 12% Bis-Tris Plus Gel were reduced, alkylated and digested with Promega modified trypsin according to the method of Shevchenko et al.<sup>12</sup> Resulting Peptides were acidified with formic acid (final concentration of 0.1%) and analyzed by nano-HPLC (Dionex Ultimate 3000) equipped with an Aurora (Ionoptics) nanocolumn (C18, 1.6  $\mu$ m, 250 x 0.075 mm). Separation was carried out at 50 °C at a flow rate of 300 nL/min using the following gradient, where solvent A is 0.1% formic acid in water and solvent B is acetonitrile containing 0.1% formic acid: 0-18 min: 2% B; 18-100 min: 2-25% B; 100-107 min: 25-35% B, 107-108 min: 35-95% B; 108-118 min: 95% B, 118-118 min: 95-2% B; 118-133 min: 2% B. A maXis II ETD mass spectrometer (Bruker) was operated with the captive source in positive mode with following settings: mass range: 200-2,000 m/z, 4 Hz, capillary 1,600 V, dry gas flow 3 L/min with 150 °C, nanoBooster 0.2 bar, precursor acquisition control top20 (CID). The LC-MS/MS data were analyzed using Data analysis software (Bruker) with the Sum Peak algorithm, and by MaxQuant 1.6.1.0 by searching the public Swissprot database with taxonomy *Homo sapiens* and common contaminants (downloaded on 16.04.2019, 20482 sequences). Carbamidomethylation on Cys was entered as a fixed modification and oxidation of methionine as a variable modification. Detailed search criteria were used as follows: trypsin, max. missed cleavage sites: 2; search mode: MS/MS ion search with decoy database search included; precursor mass tolerance +/- 0.006 Da; product mass tolerance +/- 80 ppm; acceptance parameters for identification: 1% PSM FDR; 1% protein FDR. Data processing was performed using Perseus software version 1.6.6.0. Contaminants and reverse protein sequences created during database search were removed. Intensities were log2 transformed to lower the effect of the outlier values, filtered for 3 valid values in at least one condition and normalized on the median of each column (by subtraction). For protein groups missing values an imputation step was performed. Briefly missing values were replaced with random values taken from a shifted Gaussian distribution of all valid values (width of 0.3 and downshift of 1.8 separately for each column), to simulate an intensity value for those low abundant protein groups. For statistical analysis, a Two-sample t-test was performed to identify significantly enriched proteins in the ECM1 bound samples (p-value  $\leq$  0.05); the p-value was not adjusted by multi-testing correction (since otherwise no significant results were left) (**Supplemental Table 14**).

### **Rac1,2,3 and RhoA G-LISA assay**

G-LISA assays to Rac1,2,3 (cat# BK125) and RhoA (cat# BK124) were sourced from Cytoskeleton and performed as per the manufacturer's protocols on HuCFb cells cultured in 6-well plates. Cells were incubated with starving media for 16 h, media aspirated, and replaced with starving media containing recombinant human ECM1 (20ng/ml), or starving media with no recombinant human ECM1 (control) for 10 minutes. Cell lysates were extracted, protein concentration estimated, and lysates subject to G-LISA assay as per manufacturer protocols.

### **MTT assay**

Cell Proliferation Kit I (Roche, Cat# 11 465 007 001) MTT assay was conducted on HuCFbs cultured in Greiner CELLSTAR® 96-well plates (cat# M0562) performed as per the

manufacturer's protocol with readout time-points of 24, 48 and 72 hours; starving media was supplemented with 10% FBS instead of 0.5% FBS.

### **Wound healing assay**

HuCFbs wound healing assays were cultured in Ibidi® culture-inserts (cat# 80369), inserted into each well of a 12-well cell culture plate (ThermoFisher, cat# 150628). Cells were incubated with starving media for 16 h, Ibidi® culture-inserts removed, media aspirated, and replaced with starving media containing recombinant human ECM1 (20ng/ml), or starving media with no recombinant human ECM1 (control). Phase contrast images of the cell gap were acquired hourly at 5x with a Zeiss Cell Observer microscope. Collected images were analyzed where the mean of all 4 positions per well were plotted, and rate of migration per each hour calculated. An equation was fitted over the plotted functions and the inclination (slope) during the 24-hour active migration phase was calculated and compared between control and ECM1 treated groups. For visualization, analysis was also conducted on group dependent differences in the change in rate of migration over time between control and ECM1 using two-way ANOVA by first normalizing the growth rate of all replicates/samples to be equal at time zero.

## References

1. Litviňuková M, Talavera-López C, Maatz H et al. Cells of the adult human heart. *Nature* 2020;588:466-472.
2. Alexanian M, Przytycki PF, Micheletti R et al. A transcriptional switch governs fibroblast activation in heart disease. *Nature* 2021;595:438-443.
3. Farbehi N, Patrick R, Dorison A et al. Single-cell expression profiling reveals dynamic flux of cardiac stromal, vascular and immune cells in health and injury. *eLife* 2019;8:e43882.
4. Prasad JM, Migliorini M, Galisteo R, Strickland DK. Generation of a Potent Low Density Lipoprotein Receptor-related Protein 1 (LRP1) Antagonist by Engineering a Stable Form of the Receptor-associated Protein (RAP) D3 Domain. *The Journal of biological chemistry* 2015;290:17262-8.
5. Falach R, Sapoznikov A, Gal Y et al. The low density receptor-related protein 1 plays a significant role in ricin-mediated intoxication of lung cells. *Scientific Reports* 2020;10:9007.
6. Humphrey SJ, Karayel O, James DE, Mann M. High-throughput and high-sensitivity phosphoproteomics with the EasyPhos platform. *Nature protocols* 2018;13:1897-1916.
7. Cox J, Hein MY, Lubner CA, Paron I, Nagaraj N, Mann M. Accurate proteome-wide label-free quantification by delayed normalization and maximal peptide ratio extraction, termed MaxLFQ. *Mol Cell Proteomics* 2014;13:2513-26.
8. Tyanova S, Temu T, Cox J. The MaxQuant computational platform for mass spectrometry-based shotgun proteomics. *Nature protocols* 2016;11:2301-2319.
9. Rudolph JD, de Graauw M, van de Water B, Geiger T, Sharan R. Elucidation of Signaling Pathways from Large-Scale Phosphoproteomic Data Using Protein Interaction Networks. *Cell systems* 2016;3:585-593.e3.
10. Szklarczyk D, Gable AL, Lyon D et al. STRING v11: protein-protein association networks with increased coverage, supporting functional discovery in genome-wide experimental datasets. *Nucleic acids research* 2019;47:D607-d613.
11. Pomaznoy M, Ha B, Peters B. GONet: a tool for interactive Gene Ontology analysis. *BMC Bioinformatics* 2018;19:470.
12. Shevchenko A, Wilm M, Vorm O, Mann M. Mass spectrometric sequencing of proteins silver-stained polyacrylamide gels. *Analytical chemistry* 1996;68:850-8.
